# Multiple Small RNAs Alter Membrane Lipid Composition via Post-Transcriptional Regulation of Cyclopropane Fatty Acid Synthase

Colleen M. Bianco and Carin K. Vanderpool\*

Department of Microbiology, University of Illinois, Urbana, IL 61801

\*Corresponding author  
Carin K. Vanderpool, Ph.D.  
Department of Microbiology  
University of Illinois at Urbana-Champaign  
B213 CLSL, MC-110  
601 S. Goodwin Ave.  
Urbana, IL 61801  
(t) 217-333-7033  
(f) 217-244-6697  
[cvanderp@life.illinois.edu](mailto:cvanderp@life.illinois.edu)

## Abstract

Microbial membranes are the first line of defense against environmental stress as well as the site of many metabolic processes. As such, maintenance of membrane integrity and homeostasis is key to cell survival. Altering membrane protein and lipid composition is an important strategy for maintaining membrane integrity in response to many environmental stresses. There are now numerous examples of small RNA (sRNA)-mediated regulation of membrane protein production, but less is known about how sRNAs regulate the types and relative proportions of different fatty acids in the membrane. The only sRNA known to regulate membrane fatty acid composition is RydC, which stabilizes *cfa* mRNA, encoding cyclopropane fatty acid (CFA) synthase, resulting in increased production of the synthase and higher levels of cyclopropane fatty acids (CFAs) in the cell membrane. Here, we report that three additional sRNAs, ArrS, CpxQ, and GadF also alter *cfa* translation and thus the amount of CFAs in cell membranes. RydC, ArrS, and GadF bind at sites that overlap a known RNase E cleavage site in the *cfa* mRNA 5'-untranslated region (UTR), resulting in increased *cfa* mRNA stability and translation. In contrast, CpxQ binds to a different site in the *cfa* mRNA 5'-UTR, and acts to reduce *cfa* translation. The physiological role of CFAs in membrane lipids is poorly understood, but CFAs have been shown to promote bacterial resistance to acid stress. We show that *cfa* translation increases in an sRNA-dependent manner when cells are subjected to mild acid stress. RydC is necessary for an increase in *cfa* translation at pH 5.0 and a *rydC* mutant is more sensitive to acid shock than the *rydC*<sup>+</sup> strain. Alteration of membrane lipid composition is a key mechanism for bacterial responses to many environmental stresses, including acid stress. This work suggests an important role for sRNAs in these responses through their regulation of *cfa* mRNA.

## Introduction

Bacteria modify the biophysical properties of their membranes to adapt to changing environmental conditions, such as pH, temperature, and pressure fluctuations (1). Membrane properties can be altered by changing the type or abundance of proteins embedded in the membrane or by modifying the relative proportions of different types of phospholipids. Membrane fluidity is a crucial biophysical property as it affects membrane associated functions such as permeability to solutes, solute transport, and protein- protein interactions. Because the length and saturation of the acyl chains in the phospholipids determines the fluidity of the membrane, bacteria can adjust the ratio of saturated to unsaturated fatty acids (UFA) to adapt to their environment. For example, bacteria can increase resistance to toxic compounds, such as antimicrobial peptides produced by the immune system, by increasing the production of saturated fatty acids, which will form a tightly packed and less fluid membrane compared to a membrane rich in unsaturated fatty acids.

While *de novo* production of new fatty acids is an important adaptation mechanism, sometimes bacteria are subjected to abrupt environmental changes and require rapid modification of the fatty acids already incorporated in the membrane. One post-synthetic modification is the conversion of a pre-existing UFA to a cyclopropane fatty acid (CFA) by the enzyme cyclopropane fatty acid synthase (encoded by *cfa*). CFAs occur in the phospholipids of many species of bacteria and have been linked to pathogenesis (2-4). CFAs are formed by the addition of a methylene group, derived from S-adenosyl methionine, across the double bond of an UFA incorporated in a phospholipid (3, 5). Although widely studied, the physiological function of CFAs in phospholipids remains unclear. However, the conversion of UFAs to CFAs is energetically expensive, as it requires three ATP molecules to generate one S-adenosyl methionine (6). Given this energetic cost, it is expected that CFA formation, under some conditions, is advantageous. In fact, inactivation of a *cfa* homologue that introduces a cyclopropane ring in the major cell envelope component ( $\alpha$ -mycolates) of *Mycobacterium*

*tuberculosis* leaves the bacteria unable to establish a persistent infection (4). One hypothesis is that the formation of CFAs may reduce membrane fluidity and permeability, thereby preventing undesirable molecules from entering the cell (3). Chang and Cronan identified the first phenotype for CFAs, which is protection from acid shock (7, 8). *Escherichia coli cfa* mutants were unable to survive a rapid shift from pH 7 to pH 3. CFAs in membranes have been shown to protect bacteria from acid shock because the conversion of UFA to CFA decreases permeability of the membrane to protons (9). CFAs are thought to be important for pathogenesis because an acid shock such as rapid shift from pH 7 to pH 3 occurs as an ingested pathogen goes through the stomach (2). In fact, it has been noted that pathogenic *E. coli* strains contain more CFAs and are more resistant to acid than nonpathogenic *E. coli* strains (8).

Production of CFAs is regulated in part by control of *cfa* transcription. In *E. coli* and *Salmonella*, the *cfa* gene has two promoters (10, 11). The distal promoter is  $\sigma^{70}$ -dependent and yields a longer *cfa* transcript with a 210-nt 5'-untranslated region (UTR). The proximal promoter is controlled by the general stress response  $\sigma$  factor ( $\sigma^s$ ) encoded by *rpoS* and produces a shorter *cfa* transcript with a 33-nt 5'-UTR. The  $\sigma^{70}$ -dependent promoter is functional throughout growth, whereas transcription from the  $\sigma^s$  promoter occurs only during stationary phase. CFAs are produced during early stationary phase when typically all phospholipid UFAs are converted to CFAs (10).

Recently, *cfa* mRNA was also shown to be post-transcriptionally controlled by the sRNA RydC (12). RydC is 64-nucleotides (nt) long and binds to the RNA chaperone Hfq (13). The sequence of RydC is conserved in many enteric species, particularly at the 5' end, which contains nucleotides important for base pairing with *cfa* and other known target mRNAs (12). To date, RydC is known to regulate three mRNA targets, *cfa* (12), *yejABEF* (14), and *csgD* (15) mRNAs, though the conditions and signals stimulating RydC production and the physiological role of RydC in bacterial physiology remain unknown. RydC interaction with *cfa* mRNA stabilizes

*cfa* mRNA, and in turn increases production of cyclopropane fatty acid (CFA) synthase (12). RydC specifically base pairs in the 5'-UTR of the longer isoform of *cfa* mRNA and prevents RNase E-dependent decay of the mRNA. In *Salmonella*, RydC overexpression increased the abundance of CFA synthase about 11-fold and increased levels of CFAs in membrane lipids about 4-fold but the physiological importance of this has yet to be elucidated (12).

A recent study on global mapping of sRNA-RNA interactions using *in vivo* crosslinking and sequencing identified 3 additional sRNAs (ArrS, GadF and CpxQ) that interact with *cfa* mRNA (16). Interestingly, these sRNAs were previously linked to cell envelope stress or acid response. The sRNA CpxQ is part of the Cpx two-component system that responds to cell envelope stress (17). CpxQ is processed from the 3' UTR of *cpxP* mRNA, which encodes a chaperone of the Cpx system (17). Both the Cpx two-component system and the processing of CpxQ are induced when cell membrane potential is dissipated. Together with Hfq, CpxQ was shown to reduce translation of *nhaB* (a sodium-proton antiporter), *agp* (glucose-1-phosphatase), *fimA* (the major fimbrial subunit of type 1 pilus), and *skp* (a periplasmic chaperone) (17, 18). ArrS is an antisense sRNA that is encoded upstream of *gadE*, encoding the major acid resistance transcription factor, and is complementary to the 5'-UTR of the longest *gadE* transcript (19). ArrS expression is induced by low pH via  $\sigma^S$  and GadE. Overexpression of *arrS* leads to increased acid survival, compared to WT, in a GadE- dependent manner (20). GadF was identified as an sRNA located in the 3'-UTR of *gadE* mRNA (16). GadF has been detected as an sRNA via northern blot and is putatively processed from the *gadE* transcript by an RNase. To date, GadF has not been extensively studied.

Here, we sought to elucidate the mechanisms of regulation of *cfa* mRNA by these four sRNAs, RydC, ArrS, GadF, and CpxQ, and to gain insight into the physiological importance of sRNA-mediated regulation of membrane CFA composition in the model organism *E. coli*. Our results indicate that RydC, ArrS and GadF activate *cfa* translational fusions to varying degrees, but all three require a binding site in the 5'-untranslated region. RydC, ArrS and GadF all

regulate *cfa* translation in a positive manner, and all three bind at overlapping sites that correspond to a previously identified RNase E recognition site. Our results are consistent with the idea that all three activate *cfa* by a similar mechanism that was reported previously for RydC, involving protection of *cfa* mRNA from RNase E-dependent turnover. In contrast, CpxQ represses *cfa* translation by a mechanism requiring sequences upstream of the RNase E cleavage site. While the physiological role for regulation of *cfa* by each sRNA is still unclear, our data implicate RydC-mediated activation of *cfa* in protection from acid stress.

## Results

### Four sRNAs regulate CFA synthase mRNA in an isoform-specific manner

Previous studies have characterized two transcription start sites for the *cfa* gene, encoding cyclopropane fatty acid (CFA) synthase in *E. coli* (10). Transcription from the distal promoter is  $\sigma^{70}$ -dependent and yields a longer *cfa* transcript with a 212-nt 5'-UTR (Fig. 1A) that is subject to post-transcriptional regulation by sRNAs. The sRNA RydC binds to a site in the 5'-UTR and stabilizes *cfa* mRNA by inhibiting RNase E-dependent cleavage (12). A global study of sRNA-RNA interactions recently identified three additional sRNAs that bind to the 5'-UTR of the long *cfa* mRNA isoform: ArrS, GadF, and CpxQ (16). The base pairing interactions between the latter three sRNAs and *cfa* mRNA have not yet been characterized. To verify that these sRNAs alter *cfa* translation *in vivo*, we constructed two translational *cfa*'-'*lacZ* fusions under the control of the arabinose-inducible  $P_{BAD}$  promoter. One fusion has the full 212-nt 5'-UTR (called  $P_{BAD}$ -*cfa*'-'*lacZ*-Long, Fig. 1B), which contains the RydC binding site (12), while the other has only the 34-nt 5'-UTR (called  $P_{BAD}$ -*cfa*'-'*lacZ*-Short, Fig. 1C). Base pairing predictions from IntaRNA (22) suggested that ArrS, GadF and CpxQ would base pair in the same region of *cfa* mRNA as RydC (Fig. 1A, "RydC BS"), so we hypothesized that these sRNAs would alter the translation of the  $P_{BAD}$ -*cfa*'-'*lacZ*-Long but not the  $P_{BAD}$ -*cfa*'-'*lacZ*-Short. When the individual sRNAs were ectopically expressed from a plasmid, all sRNAs affected  $P_{BAD}$ -*cfa*'-'*lacZ*-Long activity (Fig. 1B)

and had no effect on  $P_{BAD}$ -*cfa*'-'*lacZ*-Short activity (Fig. 1C). RydC, ArrS, and GadF activated the long fusion 18-, 10-, and 1.3-fold, respectively, while CpxQ repressed the long fusion ~3-fold. These results indicate that *cfa* mRNA can be post-transcriptionally activated or repressed by multiple sRNAs.

## **Post-transcriptional regulation of *cfa* mRNA by sRNAs changes membrane lipid composition**

CFA synthase forms CFAs by transferring a methylene group from S-adenosyl methionine to the double bond of an unsaturated fatty acid (UFA) of a mature phospholipid that is already incorporated in the membrane. Specifically, palmitoleic acid (C16:1) is converted into methylene-hexadecanoic acid (C17CFA) and vaccenic acid (C18:1) is converted into methylene-octadecanoic acid (C19CFA). To test how post-transcriptional regulation of *cfa* by sRNAs alters the proportion of CFAs in membrane fatty acids, we conducted gas chromatography on membrane lipids isolated from strains where each sRNA was ectopically expressed (Figure 2, Table S1). The FA composition of all strains was similar except for CFA and UFA content (Table S1). In strains carrying  $P_{lac}$ -*cfa*, there were reduced levels of 16:1 and 18:1 UFAs and ~6-fold increase in levels of C17CFA, compared to the strain carrying the vector control. Similarly, ArrS-producing cells had ~5-fold higher levels of C17CFA and reduced 16:1 and 18:1 UFAs compared to vector control. RydC-producing cells likewise had reduced levels of 16:1 and 18:1 UFAs and ~8-fold increased levels of C17CFA compared to the control strain. GadF production resulted in a slight increase in C17CFA (1.5-fold higher than vector control), while CpxQ-producing strains had modestly reduced C17CFA (~2-fold reduced compared to vector control). These data show that regulation of *cfa* mRNA translation by each sRNA is correlated with changes in membrane CFA content, implying that the regulation by sRNAs could contribute to meaningful changes in cell membrane structure and function.

## Role of sRNAs in surviving acid shock

Because CFAs have been implicated in resistance to acidic pH (7, 8), we next investigated whether sRNAs promote survival after acid shock. Survival of wild-type,  $\Delta cfa$ ,  $\Delta rydC$ ,  $\Delta arrS$ ,  $\Delta gadF$  and  $\Delta cpxQ$  strains and complemented mutants was measured after rapid shift of cultures from pH 7 to pH 3 as described in Materials and Methods. Survival was determined by the ratio of CFUs recovered after acid shock compared to CFUs before acid shock (Fig. 3). Compared to the wild-type strain, the  $\Delta rydC$ , and  $\Delta cfa$  strains had lower survival rates after the acid shock. The  $\Delta cfa$  mutant had the lowest survival rate of all the strains tested ( $\Delta cfa$   $1.0 \pm 0.3$  compared to WT  $4.3 \pm 0.5$ ). The  $\Delta rydC$  strain had a survival rate intermediate between that of  $\Delta cfa$  and wild-type ( $\Delta rydC$ ,  $2.5 \pm 0.4$ ) suggesting that RydC might be important for activating *cfa* or other targets to promote resistance to acid shock. The  $\Delta arrS$ ,  $\Delta gadF$  and  $\Delta cpxQ$  strains showed the same survival rates as wild-type, implying that these three sRNAs do not play an important role in regulating *cfa* or other targets to promote acid shock resistance under these conditions.

Complementation of the *cfa*, *rydC* and *arrS* mutations by expression of the corresponding gene from a plasmid resulted in enhanced survival of acid shock compared to the wild-type strain. Enhanced acid resistance for ArrS-producing strains was observed previously and was attributed to ArrS positively regulating *gadE* expression (20). Our data suggest that ArrS-dependent activation of *cfa* might also contribute to enhanced acid resistance of ArrS-producing cells. The complemented *gadF* and *cpxQ* strains were not different from wild-type (Fig. 3). We have shown so far that ArrS, GadF, and RydC all activate *cfa* translation and increase the CFA content in cell membranes but only deletion of *rydC* renders otherwise wild-type cells more susceptible to acid shock. These results suggest that at least RydC-mediated activation of *cfa* translation promotes cell survival during an acid shock.

## Small RNA-dependent regulation of *cfa* at acidic pH



To further investigate sRNA-dependent regulation during acid stress, we examined sRNA-dependent regulation of *cfa* translational fusions at neutral and acidic pH. Cells carrying  $P_{BAD}$ -*cfa*'-'*lacZ*-Long (Fig. 4A),  $P_{BAD}$ -*cfa*'-'*lacZ*-Short (Fig. 4B), or a fusion containing a deletion of the 5' region of the *cfa* 5'-UTR containing the sRNA binding sites ( $P_{BAD}$ -*cfa*'-'*lacZ*- $\Delta$ sRNABS, Fig. 4C) were grown in TB medium pH 7.0 to early exponential phase then subcultured into TB medium at either pH 7 or at pH 5. Samples were harvested 120 minutes later and assayed for  $\beta$ -galactosidase activity. For  $P_{BAD}$ -*cfa*'-'*lacZ*-Long, activity was higher at pH 5 compared to pH 7 (Fig. 4A). Activity of  $P_{BAD}$ -*cfa*'-'*lacZ*-Short was similar at both pH 5 and pH 7 (Fig. 4B). Likewise,  $P_{BAD}$ -*cfa*'-'*lacZ*- $\Delta$ sRNABS had similar activity at pH 5 and pH 7 (Fig. 4C). These observations indicate that activation of *cfa* mRNA in response to acidic pH occurs post-transcriptionally, and the loss of regulation of a fusion lacking the sRNA binding sites suggested that one or more sRNAs could be responsible for regulation under these conditions.

To further probe the effects of sRNA regulation of *cfa* mRNA at acidic pH, the experiment was performed in wild-type background and strains with mutations in each sRNA (Fig. 5). Activity of  $P_{BAD}$ -*cfa*'-'*lacZ*-Short was not affected by changes in pH or by deletion of any of the sRNAs (Fig. S1). For  $P_{BAD}$ -*cfa*'-'*lacZ*-Long, wild-type,  $\Delta$ arrS, and  $\Delta$ gadF strains all had similar activities at pH 7 and pH 5, with clearly increased activity at pH 5 (Fig. 5A). The  $\Delta$ cpxQ mutant had higher *cfa*'-'*lacZ* activity at pH 7 compared to wild-type (Fig. 5A). Since ectopic expression of *cpxQ* repressed *cfa* translation (Fig. 1B), the increased levels of *cfa*'-'*lacZ* activity in the  $\Delta$ cpxQ mutant suggests that at neutral pH, CpxQ is produced at sufficient levels to repress *cfa*. The  $\Delta$ cpxQ mutation had no effect on  $P_{BAD}$ -*cfa*'-'*lacZ*-Long at pH 5, where levels were similar to wild-type. The  $\Delta$ rydC mutant had lower *cfa*'-'*lacZ* activity at both pH 7 and pH 5 compared to wild-type, suggesting that RydC may be produced at sufficient levels at both neutral and acidic pH to have an activating effect on *cfa* translation under both conditions. We have shown that ArrS, GadF, and RydC all activate *cfa* translation and increase the CFA content in cell membranes but only deletion of *rydC* affects  $P_{BAD}$ -*cfa*'-'*lacZ*-Long activity at pH

5.0. This observation fits with our previous result that deletion of *rydC* renders otherwise wild-type (*cfa*<sup>+</sup>) cells more susceptible to acid shock (Fig. 3).

To further investigate the interplay of the sRNAs on *cfa* mRNA translation at different pH values, we deleted *rydC* in combination with every other sRNA in the P<sub>BAD-*cfa*'-lacZ</sub>-Long strain (Fig. 5B) and P<sub>BAD-*cfa*'-lacZ</sub>-Short (Fig. S1B) and measured  $\beta$ -galactosidase activity of the reporter fusions at pH 7 and pH 5. Deletions of each sRNA in the  $\Delta$ *rydC* background had no effect on P<sub>BAD-*cfa*'-lacZ</sub>-Short activity (Fig. S1B). Deletion of *arrS* or *gadF* in the  $\Delta$ *rydC* background had no effect on P<sub>BAD-*cfa*'-lacZ</sub>-Long activity compared to the  $\Delta$ *rydC* parent (Fig. 5B), suggesting that neither ArrS nor GadF play a role in regulation of *cfa* translation under these conditions.

Compared with the  $\Delta$ *rydC* parent, the  $\Delta$ *cpxQ*  $\Delta$ *rydC* strain had slightly higher P<sub>BAD-*cfa*'-lacZ</sub>-Long activity at pH 7 (Fig. 5B). In contrast, at pH 5, the  $\Delta$ *rydC* parent and  $\Delta$ *cpxQ*  $\Delta$ *rydC* strain had similar levels of P<sub>BAD-*cfa*'-lacZ</sub>-Long activity (Fig. 5B). Altogether, the data are consistent with the hypothesis that RydC exerts a positive effect on *cfa* mRNA at both neutral and acidic pH under our growth conditions. In contrast, CpxQ has a mild repressive effect on *cfa* mRNA only at neutral pH.

## **RpoS is not responsible for observed differences in *cfa* mRNA regulation**

The  $\sigma^S$ -dependent *cfa* promoter was previously implicated in increased CFA levels when cells were grown at pH 5 compared to pH 7 (7). P<sub>BAD-*cfa*'-lacZ</sub>-Long contains region encompassing the  $\sigma^S$  dependent promoter, so it was possible that RpoS could be regulating *cfa* transcription in the context of the P<sub>BAD-*cfa*'-lacZ</sub>-Long during mild acid stress. To determine if RpoS impacts regulation of *cfa* under our conditions, we measured P<sub>BAD-*cfa*'-lacZ</sub>-Long activity at pH 5 and 7 in a  $\Delta$ *rpoS* background (Fig. 6A). Deletion of *rpoS* had no effect on P<sub>BAD-*cfa*'-lacZ</sub>-Long activity at pH 5 or 7 and we observed the same increase in activity in response to pH

5 in both wild-type and  $\Delta rpoS$  backgrounds, indicating that RpoS does not impact the observed activity of the  $P_{BAD}\text{-}cfa\text{'-}lacZ\text{-Long}$  fusion.

We showed that ectopic production of each sRNA, RydC, ArrS, GadF, and CpxQ can regulate  $P_{BAD}\text{-}cfa\text{'-}lacZ\text{-Long}$  (Fig. 1B). While the experiment above suggests that pH-dependent regulatory effects are not mediated by RpoS, we wanted to further test whether sRNAs could be acting indirectly on *cfa* via post-transcriptional regulation of *rpoS*. We ectopically expressed CpxQ, RydC, ArrS, or GadF in wild-type and  $\Delta rpoS$   $P_{BAD}\text{-}cfa\text{'-}lacZ\text{-Long}$  strains and did not observe any differences in sRNA-dependent regulation between wild-type and  $\Delta rpoS$  (Fig. 6B), indicating that the sRNA-dependent regulation is not mediated indirectly through RpoS. These data further support the idea that the regulation of *cfa* by these sRNAs is direct.

# **Activating and repressing sRNAs bind distinct sites on *cfa* mRNA**

RydC, ArrS, GadF, and CpxQ all regulated the *cfa* translational fusion containing the *cfa* 212-nt 5'-UTR but not the *cfa* translational fusion containing only the 34-nt 5'-UTR suggesting that each sRNA base pairs within the -212 to -34 (relative to the start of translation) region of *cfa* mRNA. The mechanism of RydC regulation of *cfa* mRNA was shown to be stabilization via pairing with an RNase E recognition site to prevent cleavage (12). To determine the mechanism of regulation by ArrS, GadF, and CpxQ, we used previously published data paired with computational methods to predict each sRNA binding site (Fig. 7A). To genetically test these base pairing predictions, we first constructed a translational fusion with a 133-nt deletion from the beginning of the 212-nt 5'-UTR, which contains predicted binding sites for all sRNAs ( $P_{BAD}\text{-}cfa\text{'-}lacZ\text{-}\Delta sRNABS$ , Fig. 7B), including the RNase E recognition site that RydC protects. Of note, the  $P_{BAD}\text{-}cfa\text{'-}lacZ\text{-}\Delta sRNABS$  fusion had a higher basal level of activity compared to  $P_{BAD}\text{-}cfa\text{'-}lacZ\text{-Long}$  (Fig. 7C compared to Fig. 1B), presumably because the  $P_{BAD}\text{-}cfa\text{'-}lacZ\text{-Long}$

$\Delta$ sRNABS fusion lacks the known RNase E cleavage site at position 109-nt (12). When each individual sRNA was ectopically expressed from a plasmid, none of the sRNAs affected  $P_{BAD}$ -*cfa*'-/*lacZ*- $\Delta$ sRNABS activity (Fig. 7C), suggesting each sRNA binds at a site upstream of -79.

To test base-pairing predictions with each sRNA more specifically, we did a mutational analysis. RydC, GadF, and ArrS are all predicted to bind the same region of *cfa* mRNA (Fig. 2A, Fig. 3A-C). To investigate the importance of these interactions, we introduced three point mutations in each sRNA that were predicted to disrupt base pairing to  $P_{BAD}$ -*cfa*'-/*lacZ*-Long (C7G, G8C, A9U for *arrS1* (Fig. 8A), C26G, G28C, A29U for *gadF1* (Fig. 8B), C5G, G6C, A7U for *rydC6* (Fig. 8C)). These mutated sRNA variants, *arrS1*, *gadF1* and *rydC6*, could no longer activate  $P_{BAD}$ -*cfa*'-/*lacZ*-Long (Fig. 8D). We made the compensatory mutations (U103A, C102G, G101C) to create  $P_{BAD}$ -*cfa*'-/*lacZ*-LongAGC, to restore putative base pairing interactions with the mutant sRNAs (Fig. 8A-C, E). Wild-type ArrS, GadF, and RydC could not activate the mutant  $P_{BAD}$ -*cfa*'-/*lacZ*-LongAGC fusion (Fig. 8E), consistent with the idea that these residues in the *cfa* 5'-UTR are critical for interactions with all three sRNAs. In contrast, all three mutants: RydC6, GadF1, and ArrS1, activated the  $P_{BAD}$ -*cfa*'-/*lacZ*-LongAGC fusion (Fig. 8E), with fold-activation restored to levels similar to the wild-type mRNA-sRNA pairs (Figs. 1B, 8D).

To further characterize CpxQ-mediated regulation of *cfa* mRNA, we deleted the first 22-nt of the 212-nt 5'-UTR (-212 to -190, called  $P_{BAD}$ -*cfa*'-/*lacZ*- $\Delta$ CpxQBS, Fig. 9A) which includes the putative CpxQ binding site (Fig. 7A). This fusion was insensitive to CpxQ, suggesting that CpxQ-dependent repression requires a site within the -212 to -190 region of *cfa* 5'-UTR. Interestingly,  $P_{BAD}$ -*cfa*'-/*lacZ*- $\Delta$ CpxQBS had lower basal activity compared to  $P_{BAD}$ -*cfa*'-/*lacZ*-Long, suggesting that the -212 to -190 region of the 5' UTR *cfa* mRNA may play a role in *cfa* mRNA structure and stability. Based on these data, we hypothesize that ArrS and GadF regulate *cfa* by the same mechanism as RydC, stabilizing the *cfa* mRNA transcript by impairing RNase E-mediated decay (12). CpxQ-mediated repression must occur via a different mechanism that has yet to be determined.

## Discussion

Small RNAs (sRNAs) are important post-transcriptional regulators that play key roles in the response to environmental stress. We are interested in how sRNAs can contribute to membrane modification in response to stressors, particularly how sRNAs can lead to altered phospholipid composition. In the present work, we investigate the roles of multiple sRNAs in regulating the translation of *cfa* mRNA, encoding a key enzyme used to alter lipid composition of bacterial membranes. We show that the *cfa* gene can be post-transcriptionally regulated by four sRNAs, all of which act on the same long isoform of *cfa* mRNA that results from transcription from the constitutive  $\sigma^{70}$ -dependent promoter. The sRNAs RydC, ArrS, and GadF activate *cfa* translation resulting in increased membrane CFA levels, while the sRNA CpxQ represses *cfa* translation leading to reduced membrane CFA levels. Our data suggest that one of the physiological functions of sRNA-mediated regulation of *cfa* mRNA is protection of cells from acid stress. Loss of *rydC* made *cfa*<sup>+</sup> cells less resistant to acid shock (Fig. 3), which was consistent with the observation that loss of RydC reduced *cfa* translation at both neutral and acid pH (Fig. 5A,B). Acid stress phenotypes were also apparent for strains ectopically expressing ArrS (Fig. 3), which may be due to both ArrS-mediated activation of *cfa* and *gadE*.

Previous studies determined that the RydC-*cfa* mRNA base pairing prevents RNase E-mediated decay and stabilizes the mRNA to allow increased translation (12). We hypothesize, because ArrS and GadF base pair with the same region of *cfa* mRNA as RydC, that ArrS and GadF would regulate *cfa* mRNA stability via a similar mechanism. However, CpxQ must be repressing *cfa* translation by a different mechanism. CpxQ has been shown to repress other mRNA targets using one of two conserved seed regions (17). One of these seed regions matches the region of CpxQ predicted to base pair with *cfa* mRNA. CpxQ represses its other targets by base pairing near the Shine-Dalgarno sequence to prevent ribosome binding and

directly inhibit translation initiation, or by base pairing within the coding region and stimulating mRNA decay by RNase E (17). Neither of these mechanisms is analogous to regulation of *cfa* by CpxQ. We observed that when we deleted the putative CpxQ binding site from the  $P_{BAD-cfa}'-lacZ$ -Long fusion, the basal level of activity of the fusion decreased. This may indicate that the CpxQ base pairing site is required for *cfa* mRNA stability, leading to increased turnover of *cfa* mRNA when the site is deleted. We propose that CpxQ base pairing with *cfa* mRNA may also stimulate mRNA turnover. The known RNase E recognition site protected by RydC far downstream of the putative CpxQ binding site (Fig. 7A). It is possible that CpxQ binding upstream promotes a structural rearrangement that makes that site more sensitive to RNase E. Future work will analyze the full structure of the *cfa* 5'-UTR in the presence and absence of CpxQ, and determine whether CpxQ-mediated regulation of *cfa* depends on RNase E.

Regulation of *cfa* mRNA by multiple sRNAs suggests that under some condition(s) these sRNAs influence membrane lipid composition and membrane integrity to promote fitness or stress resistance. Towards elucidating the physiological roles of RydC, ArrS, GadF, and CpxQ in the regulation of membrane composition, we investigated the role of each sRNA in acid stress, a condition where CFA synthase is known to play a role (7, 8). We determined that *cfa* translation was higher when cells were exposed to pH 5 compared to pH 7. When *rydC* was deleted, *cfa* translation could not reach maximum wild-type levels at pH 5 and  $\Delta rydC$  mutants were more susceptible to acid shock compared to wild-type, giving us the first phenotype associated with RydC. However, it is not currently known if activation of *cfa* at acidic pH is the major physiological role of RydC, as the conditions and signals stimulating RydC production are not yet known.

While ectopic expression of *arrS* increased *cfa* translation and promoted higher levels of acid resistance, deletion of *arrS* did not affect *cfa* translation or acid shock survival, indicating that ArrS may not play a role acid stress under the conditions tested. ArrS has been characterized as an activator of the transcriptional activator GadE and ectopic expression of

ArrS increases acid resistance though its activation of *gadE* but a deletion phenotype has not been reported (19, 20). We propose that ArrS may activate *cfa* under another condition where CFAs in the membrane contribute to resistance, such as heat or pressure. Currently, the only known stimulus of ArrS transcription is acid (19).

Expression of GadF only slightly increased *cfa* translation and a *gadF* deletion did not affect *cfa* translation or acid shock survival, indicating that GadF also does not play a role in acid stress under the conditions tested. GadF is relatively uncharacterized but was shown to activate *acrB* 12-fold compared to the reported 2-fold activation of *cfa* (16). AcrB is an efflux pump that uses proton motive force to pump compounds, such as antibiotics, organic solvents, and detergents, out of the cell (23). GadF regulation of *cfa* mRNA may be relevant under these conditions, as CFA membrane content has been shown to promote resistance to organic solvents (24). Understanding the regulation of GadF itself would provide insight into the importance of its regulation of *cfa* mRNA, however, it is not currently known how *gadE* mRNA (from which GadF is derived) is processed or in response to what stimuli.

CpxQ is the only sRNA of the four we have characterized that represses *cfa* translation. Deletion of *cpxQ* resulted in higher *cfa* translation at pH 7 compared to wild-type, but did not affect *cfa* translation at pH 5. Responding to acid stress is likely not the relevant physiological role for CpxQ, since deletion of *cpxQ* did not affect acid shock survival. However, our observation that CpxQ represses *cfa* translation at neutral pH combined with what is known about CpxQ may provide some insight. CpxQ is part of the Cpx two-component system that responds to cell envelope stress (17, 18). Both the Cpx two-component system and the processing of CpxQ are induced when cell membrane potential is dissipated (17). CpxQ was shown to reduce translation of four inner membrane proteins including *nhaB*, a sodium-proton antiporter (17). When the cytoplasm becomes basic, NhaB can pump in  $3\text{H}^+$  in exchange for  $2\text{Na}^+$  out. However, if NhaB pumps in too many  $\text{H}^+$ , the inner membrane potential is dissipated and CpxQ is induced to repress *nhaB* translation (17). We predict that CpxQ would also



repress *cfa* translation under this condition because CFAs in the inner membrane are known to decrease membrane permeability to  $H^+$  and in a situation where  $H^+$  concentration is too high in the cytoplasm,  $H^+$  could passively cross the inner membrane to get out of the cytoplasm. Determining how and under what conditions CpxQ differentially regulates its regulon would elucidate the link between inner membrane stress and acid stress.

The UFA to CFA conversion by CFA synthase is energetically expensive, so it is not surprising that CFA synthase production is tightly controlled at the transcriptional level and at the post-transcriptional level by multiple sRNAs. Regulation of *cfa* mRNA by multiple sRNAs may have many advantages. There are a few examples of multiple sRNAs acting on the same target. Post-transcriptional control of the important transcription factor RpoS ( $\sigma^S$ ) by multiple sRNAs to mediate responses to diverse conditions is well documented (25). The *rpoS* gene is post-transcriptionally regulated by at least four sRNAs in response to different conditions. sRNA regulation of *rpoS* highlights the potential importance of regulation of the same mRNA target by multiple sRNAs: synthesis of the sRNAs are induced by different stresses which allows RpoS in turn to properly respond to these various stress signals. The stimulus that causes synthesis of ArrS, CpxQ, GadF, and RydC would give more insight into how and why *cfa* mRNA is regulated by multiple sRNAs. It is known that transcription of *arrS* is induced by acid stress and that CpxQ is processed in response to cell membrane potential dissipation, but how that relates to their regulation of *cfa* is not understood. The regulation of *rydC* itself has not been elucidated, and it is not currently known how *gadE* is processed or in response to what stimuli.

Regulation of *cfa* mRNA by multiple sRNAs may provide an additional mechanism to deal with acid stress beyond that of RpoS and the  $\sigma^S$ -dependent promoter of *cfa*. The  $\sigma^{70}$ -dependent promoter, which yields the longer *cfa* transcript, is functional throughout growth, whereas transcription from the  $\sigma^S$  promoter occurs only during stationary phase (10). Thus, the *cfa* transcript from the  $\sigma^{70}$ -dependent promoter would potentially be in the cell available to be stabilized by RydC if the pH becomes acidic. Consistent with this hypothesis, we found that



transcription from the  $\sigma^{70}$  dependent promoter does not increase upon exposure to mild acid (data not shown) but that an sRNA produced under those conditions can stabilize the already present transcripts.

Previous work has extensively shown that sRNAs play an integral role in changing membrane protein composition in response to changing environments but how sRNAs influence membrane fatty acid composition is not well studied. Here, we build on the first example of an sRNA altering fatty acid composition by showing regulation of *cfa* by four sRNAs. Currently, the sRNAs studied here are the only examples of sRNAs altering the fatty acid composition of membranes, which can consequently alter the stability and permeability of the membrane.

## Materials and Methods

### Strain and plasmid construction

Strains and plasmids used in this study are listed in Table S2. All strains used in this study are derivatives of *E. coli* K-12 DJ624 (D. Jin, National Cancer Institute). Oligonucleotide primers used in this study are listed in Table S3. Integrated DNA Technologies synthesized the primers.  $\Delta rpoS$  and  $\Delta cfa$  mutations were made via P1 *vir* transduction from the Keio collection (26). All other chromosomal mutations were made using  $\lambda$  Red recombination (27, 28) and marked alleles were moved between strains by P1 *vir* transduction (29). Kanamycin markers were removed using *pcp20* (27).

$P_{BAD^-} cfa'-lacZ$  -Long,  $P_{BAD^-} cfa'-lacZ$  -Short,  $P_{BAD^-} cfa'-lacZ$  - $\Delta$ sRNABS, and  $P_{BAD^-} cfa'-lacZ$  - $\Delta$ CpxQBS translational *lacZ* reporter fusions under the control of the  $P_{BAD}$  promoter were constructed by PCR amplifying the *cfa* 5'UTR fragment of interest using primers containing 5' homologies to  $P_{BAD}$  and *lacZ* (Table S3).  $P_{BAD^-} cfa'-lacZ$  -Long and  $P_{BAD^-} cfa'-lacZ$  -Short were made by Alisa King (King et al. 2018).  $P_{BAD^-} cfa'-lacZ$  -LongAGC was made using Gibson Assembly (30). pBR322 was amplified using primers with 5' homologies to the *cfa* 5'UTR containing the three point mutations. Gibson reaction was performed using NEBuilder HiFi DNA

Assembly Master Mix (New England Biolabs) according to the manufacture's protocol. The Gibson product was transformed into XL10 competent cells and the plasmid was purified. The mutated *cfa* 5'UTR fragment of interest was PCR amplified from this plasmid using primers containing 5' homologies to  $P_{BAD}$  and *lacZ* (Table S3). PCR products were recombined into PM1205 using  $\lambda$  Red homologous recombination and counter-selection against *sacB* as previously described (31).

Plasmids containing CpxQ, ArrS, RydC, GadF, Cfa under the control of the  $P_{LacO}$  promoter were constructed by PCR amplifying each gene from *E. coli* MG1655 chromosomal DNA using oligonucleotides containing HindIII and BamHI restriction sites (Table S3). PCR products and vector pBRCS12 (32) were digested with HindIII and BamHI (New England Biolabs) restriction endonucleases. Digestion products were ligated using DNA Ligase (New England Biolabs) to produce the plasmids.

$P_{LacO}$ -*arrS1*,  $P_{LacO}$ -*gadF1*, and  $P_{LacO}$ -*rydC6* were created using QuikChange mutagenesis (Agilent Technologies) using primers in Table S3.

# **Media and growth conditions**

Bacteria were cultured in Luria–Bertani (LB) broth medium or on LB agar plates at 37°C, unless stated otherwise. When necessary, media were supplemented with antibiotics at following concentrations: 100  $\mu\text{g ml}^{-1}$  ampicillin (Amp) or 25  $\mu\text{g ml}^{-1}$  kanamycin (Kan). Isopropyl  $\beta$ -D-1-thiogalactopyranoside (IPTG) was used at 0.1 mM for induction of expression from  $P_{LacO-1}$  promoter.

# **$\beta$ -Galactosidase assays**

## *Ectopic expression of sRNAs:*

Bacterial strains harboring translational *lacZ* reporter fusions carrying an empty,  $P_{lac}$ -*arrS*,  $P_{lac}$ -*cpxQ*,  $P_{lac}$ -*gadF*, or  $P_{lac}$ -*rydC* plasmid were cultured overnight in Terrific Broth (TB) with Amp and 0.002% L-arabinose then subcultured 1:100 to fresh TB medium containing Amp and 0.002% L-arabinose. Strains were grown at 37°C with shaking to early exponential phase then

0.1 mM IPTG was added to induce sRNA expression. Samples were harvested 60 minutes later and  $\beta$ -galactosidase assays were then performed as previously described (29).

#### *Acid:*

Bacterial strains harboring translational *lacZ* reporter fusions were cultured overnight in TB medium pH 7.0 with 0.002% L-arabinose then subcultured 1:100 to fresh TB medium pH 7.0 containing 0.002% L-arabinose. Strains were grown at 37°C with shaking for 2 hours then strains were subcultured 1:100 again into TB medium with 0.002% L-arabinose at pH 7.0 or pH 5.0. Samples were harvested 120 minutes later and  $\beta$ -galactosidase assays were then performed as previously described (29).

#### **Analysis of fatty acids**

Cells were cultured overnight in LB containing Amp and subcultured 1:100 to fresh LB containing Amp. Cells were grown to an OD<sub>600</sub> of 0.1 then plasmids were induced with 0.1M IPTG for one hour. Cells were then spun down and the cell pellet was washed twice with MilliQ water. Fatty acids were extracted according to a previously described protocol, method 3.1 (33). Pentadecanoic acid methyl ester was used as an internal standard. The bacterial sample was spiked with 500  $\mu$ g of the internal standard, pentadecanoic acid, and then the sample was transesterified with 2 mL of 0.5M sodium methoxide for 1 min at room temperature. Fatty acid methyl esters (FAMES) were then extracted using 2 mL of hexane. The solution was centrifugation at 2000 rpm for 5 min and the organic upper phase was removed and dried under nitrogen. FAMES were treated with trimethylsilyldiazomethane in methanol to ensure complete methylation. FAMES were identified on an Agilent 6890N GC with a 5973 MS and a Zebron WAX column (30m x 0.25mm x 0.25 $\mu$ m).

#### **Acid Shock Assay**

Strains were grown overnight in LB with Amp then subcultured 1:100 into LB with Amp at pH 7.0 and grown at 37°C with shaking until OD<sub>600</sub> = 0.1. Plasmids were induced with 0.1mM IPTG.

482 When strains reached an OD<sub>600</sub> of 0.2, cultures were diluted 10x into LB pH 3.0 and incubated  
483 at 37°C with no shaking for 60 minutes. Survival was determined by the ratio of CFUs on the LB  
484 plates after acid shock to CFUs on the LB plate before acid shock.

485  
486

# References

1. Zhang YM, Rock CO. 2008. Membrane lipid homeostasis in bacteria. *Nature Reviews Microbiology* 6:222-233.
2. Cronan JE. 2002. Phospholipid modifications in bacteria. *Current Opinion in Microbiology* 5:202-205.
3. Grogan DW, Cronan JE. 1997. Cyclopropane ring formation in membrane lipids of bacteria. *Microbiology and Molecular Biology Reviews* 61:429-&.
4. Glickman MS, Cox JS, Jacobs WR. 2000. A novel mycolic acid cyclopropane synthetase is required for cording, persistence, and virulence of *Mycobacterium tuberculosis*. *Molecular Cell* 5:717-727.
5. Law JH. 1971. Biosynthesis of Cyclopropane Rings. *Accounts of Chemical Research* 4:199-&.
6. Taylor F, Cronan JE. 1976. Selection and Properties of *Escherichia coli* Mutants Defective in the Synthesis of Cyclopropane Fatty Acids. *Journal of Bacteriology* 125:518-523.
7. Chang YY, Cronan JE. 1999. Membrane cyclopropane fatty acid content is a major factor in acid resistance of *Escherichia coli*. *Molecular Microbiology* 33:249-259.
8. Brown JL, Ross T, McMeekin TA, Nichols PD. 1997. Acid habituation of *Escherichia coli* and the potential role of cyclopropane fatty acids in low pH tolerance. *International Journal of Food Microbiology* 37:163-173.
9. Shabala L, Ross T. 2008. Cyclopropane fatty acids improve *Escherichia coli* survival in acidified minimal media by reducing membrane permeability to H<sup>+</sup> and enhanced ability to extrude H<sup>+</sup>. *Research in Microbiology* 159:458-461.
10. Wang AY, Cronan JE. 1994. The Growth Phase-dependent Synthesis of Cyclopropane Fatty Acids in *Escherichia coli* Is the Result of an Rpos(Katf)-dependent Promoter Plus Enzyme Instability. *Molecular Microbiology* 11:1009-1017.
11. Kim BH, Kim S, Kim HG, Lee J, Lee IS, Park YK. 2005. The formation of cyclopropane fatty acids in *Salmonella enterica* serovar Typhimurium. *Microbiology-Sgm* 151:209-218.
12. Frohlich KS, Papenfort K, Fekete A, Vogel J. 2013. A small RNA activates CFA synthase by isoform-specific mRNA stabilization. *Embo Journal* 32:2963-2979.

- 519 13. Zhang AX, Wassarman KM, Rosenow C, Tjaden BC, Storz G, Gottesman S. 2003.  
520 Global analysis of small RNA and mRNA targets of Hfq. *Molecular Microbiology*  
521 50:1111-1124.
- 522 14. Antal M, Bordeau V, Douchin V, Felden B. 2005. A small bacterial RNA regulates a  
523 putative ABC transporter. *Journal of Biological Chemistry* 280:7901-7908.
- 524 15. Bordeau V, Felden B. 2014. Curli synthesis and biofilm formation in enteric bacteria are  
525 controlled by a dynamic small RNA module made up of a pseudoknot assisted by an  
526 RNA chaperone. *Nucleic Acids Research* 42:4682-4696.
- 527 16. Melamed S, Peer A, Faigenbaum-Romm R, Gatt YE, Reiss N, Bar A, Altuvia Y,  
528 Argaman L, Margalit H. 2016. Global Mapping of Small RNA-Target Interactions in  
529 Bacteria. *Molecular Cell* 63:884-897.
- 530 17. Chao YJ, Vogel J. 2016. A 3' UTR-Derived Small RNA Provides the Regulatory  
531 Noncoding Arm of the Inner Membrane Stress Response. *Molecular Cell* 61:352-363.
- 532 18. Grabowicz M, Koren D, Silhavy TJ. 2016. The CpxQ sRNA Negatively Regulates Skp To  
533 Prevent Mistargeting of beta-Barrel Outer Membrane Proteins into the Cytoplasmic  
534 Membrane. *Mbio* 7:8.
- 535 19. Aiso T, Murata M, Gamou S. 2011. Transcription of an antisense RNA of a gadE mRNA  
536 is regulated by GadE, the central activator of the acid resistance system in *Escherichia*  
537 *coli*. *Genes to Cells* 16:670-680.
- 538 20. Aiso T, Kamiya S, Yonezawa H, Gamou S. 2014. Overexpression of an antisense RNA,  
539 ArrS, increases the acid resistance of *Escherichia coli*. *Microbiology-Sgm* 160:954-961.
- 540 21. Chen YY, Ganzle MG. 2016. Influence of cyclopropane fatty acids on heat, high  
541 pressure, acid and oxidative resistance in *Escherichia coli*. *International Journal of Food*  
542 *Microbiology* 222:16-22.
- 543 22. Mann M, Wright PR, Backofen R. 2017. IntaRNA 2.0: enhanced and customizable  
544 prediction of RNA-RNA interactions. *Nucleic Acids Research* 45:W435-W439.
- 545 23. Anes J, McCusker MP, Fanning S, Martins M. 2015. The ins and outs of RND efflux  
546 pumps in *Escherichia coli*. *Frontiers in Microbiology* 6:14.
- 547 24. Kanno M, Katayama T, Tamaki H, Mitani Y, Meng XY, Hori T, Narihiro T, Morita N,  
548 Hoshino T, Yumoto I, Kimura N, Hanada S, Kamagata Y. 2013. Isolation of Butanol- and  
549 Isobutanol-Tolerant Bacteria and Physiological Characterization of Their Butanol  
550 Tolerance. *Applied and Environmental Microbiology* 79:6998-7005.

- 551 25. Battesti A, Majdalani N, Gottesman S. 2011. The RpoS-Mediated General Stress  
552 Response in Escherichia coli, p 189-213. *In* Gottesman S, Harwood CS (ed), Annual  
553 Review of Microbiology, Vol 65, vol 65. Annual Reviews, Palo Alto.
- 554 26. Baba T, Ara T, Hasegawa M, Takai Y, Okumura Y, Baba M, Datsenko KA, Tomita M,  
555 Wanner BL, Mori H. 2006. Construction of Escherichia coli K-12 in-frame, single-gene  
556 knockout mutants: the Keio collection. Molecular Systems Biology 2:11.
- 557 27. Datsenko KA, Wanner BL. 2000. One-step inactivation of chromosomal genes in  
558 Escherichia coli K-12 using PCR products. Proceedings of the National Academy of  
559 Sciences of the United States of America 97:6640-6645.
- 560 28. Yu DG, Ellis HM, Lee EC, Jenkins NA, Copeland NG, Court DL. 2000. An efficient  
561 recombination system for chromosome engineering in Escherichia coli. Proceedings of  
562 the National Academy of Sciences of the United States of America 97:5978-5983.
- 563 29. Miller, H J. 1972. Experiments in Molecular Genetics. Cold Spring Harbor Laboratory  
564 Press, Cold Spring Harbor Laboratory, New York.
- 565 30. Gibson DG, Young L, Chuang RY, Venter JC, Hutchison CA, Smith HO. 2009.  
566 Enzymatic assembly of DNA molecules up to several hundred kilobases. Nature  
567 Methods 6:343-U41.
- 568 31. Mandin P, Gottesman S. 2009. A genetic approach for finding small RNAs regulators of  
569 genes of interest identifies RybC as regulating the DpiA/DpiB two-component system.  
570 Molecular Microbiology 72:551-565.
- 571 32. Wadler CS, Vanderpool CK. 2009. Characterization of homologs of the small RNA SgrS  
572 reveals diversity in function. Nucleic Acids Research 37:5477-5485.
- 573 33. Dionisi F, Golay PA, Elli M, Fay LB. 1999. Stability of cyclopropane and conjugated  
574 linoleic acids during fatty acid quantification in lactic acid bacteria. Lipids 34:1107-1115.  
575

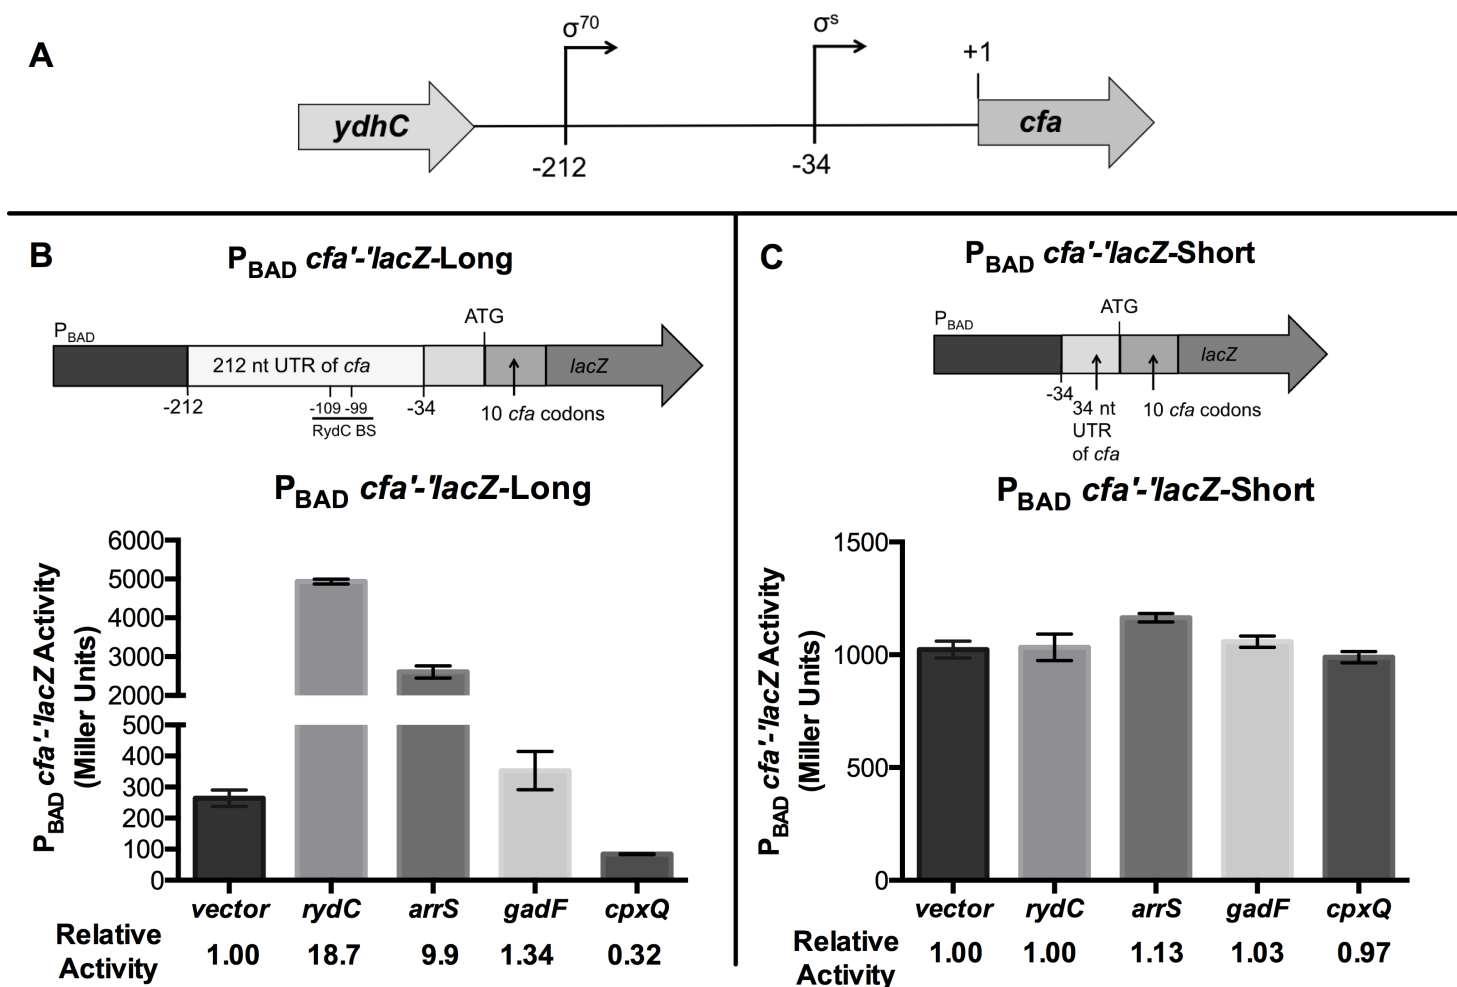

**Figure 1:** *cfa* translation is controlled by multiple sRNAs. (A) *cfa* has two promoters. Transcription from the distal promoter is  $\sigma^{70}$ -dependent and yields a longer *cfa* transcript with a 212-nt 5' UTR. Transcription from the proximal promoter is controlled by  $\sigma^s$  and produces a shorter *cfa* transcript with a 34-nt 5' UTR. (B-C Top) Two *cfa* translational fusions to *lacZ* (controlled by P<sub>BAD</sub> promoter) were constructed. The P<sub>BAD</sub>-*cfa*'-'*lacZ*-Long fusion (B) is from the distal  $\sigma^{70}$  dependent promoter which contains a 212-nt 5' UTR that includes the RydC binding site (indicated by bar labeled "RydC BS") and the sites predicted for the ArrS, CpxQ, and GadF. The P<sub>BAD</sub>-*cfa*'-'*lacZ* Short fusion (C) contains only proximal the  $\sigma^s$  dependent promoter and consequently not the predicted sRNA binding sites. (B-C Bottom) P<sub>BAD</sub>-*cfa*'-'*lacZ*-Long (B) and P<sub>BAD</sub>-*cfa*'-'*lacZ*-Short (C) carrying an empty, P<sub>lac</sub>-*arrS*, P<sub>lac</sub>-*cpxQ*, P<sub>lac</sub>-*gadF*, or P<sub>lac</sub>-*rydC* plasmid were grown in TB medium with 0.002% L-arabinose to early exponential phase then 0.1 mM IPTG was added to induce sRNA expression. Samples were harvested 60 minutes later and assayed for  $\beta$ -galactosidase activity of the reporter fusion. Error bars represent standard deviation for three biological replicates.



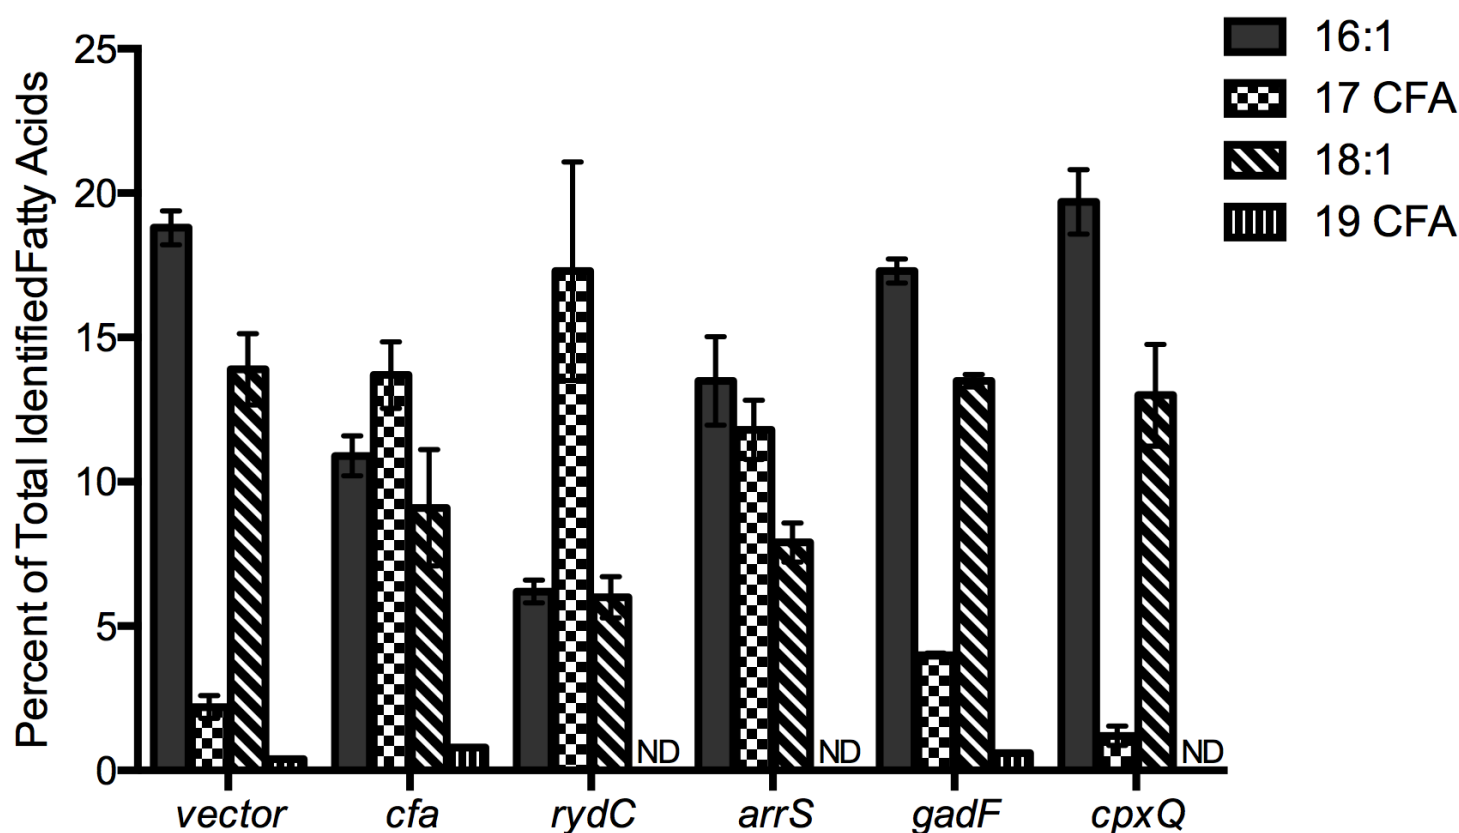

**Figure 2:** Expression of sRNAs can alter fatty acid composition: Relative qualification of fatty acids in *E. coli* in response to ectopic expression of vector control, *cfa*, *rydC*, *arrS*, *gadF*, or *cpxQ*. Fatty acids are presented as a percent of total identified fatty acids. Error represents average ± standard deviation, n=3 or \*n=2. ND: not detected

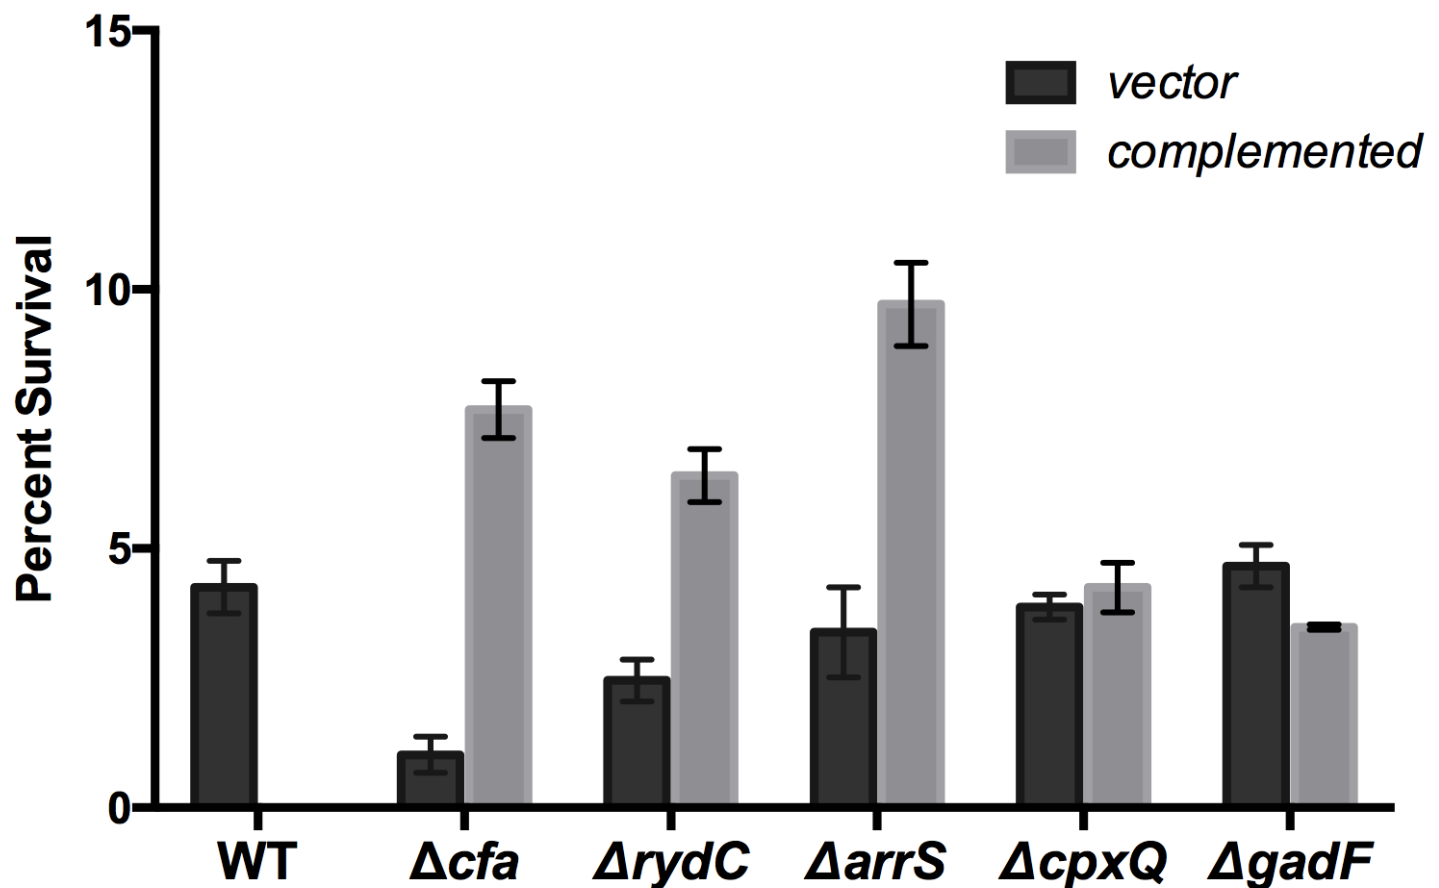

**Figure 3.** Survival during an acid challenge. Strains were grown overnight in LB then subcultured into LB at pH 7.0 and grown at 37°C with shaking. Plasmids were induced with 0.1mM IPTG. When strains reached an OD<sub>600</sub> of 0.2, cultures were diluted 10x into LB pH 3.0 and incubated at 37°C with no shaking for 60 minutes. Survival was determined by the ratio of CFUs on the LB plates after acid shock to CFUs on the LB plate before acid shock. Error bars represent average  $\pm$  standard deviation of 3 technical replicates.

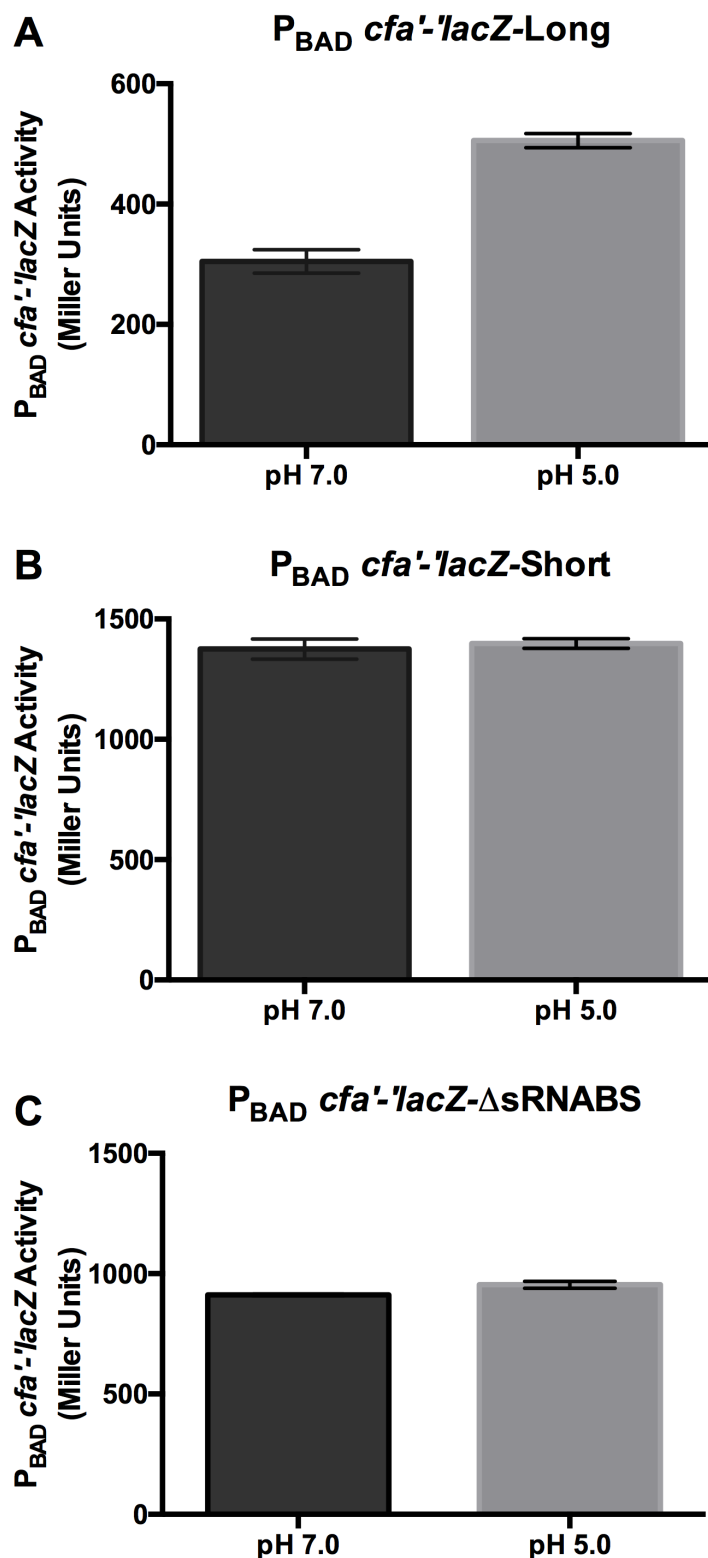

**Figure 4:** *cfa* translation is induced at acidic pH. Cells carrying (A)  $P_{BAD}$ -*cfa'*-*'lacZ*-Long, (B)  $P_{BAD}$ -*cfa'*-*'lacZ*-Short, or (C)  $P_{BAD}$ -*cfa'*-*'lacZ*- $\Delta$ sRNABS were grown in TB medium pH 7.0 with 0.002% L-arabinose to early exponential phase then cells were subcultured into TB medium with 0.002% L-arabinose at either pH 7.0 (pH 7.0) or pH 5.0 (pH 5.0). Samples were harvested 120 minutes later and assayed for  $\beta$ -galactosidase activity of the reporter fusion. Data was analyzed as described in Figure 1.

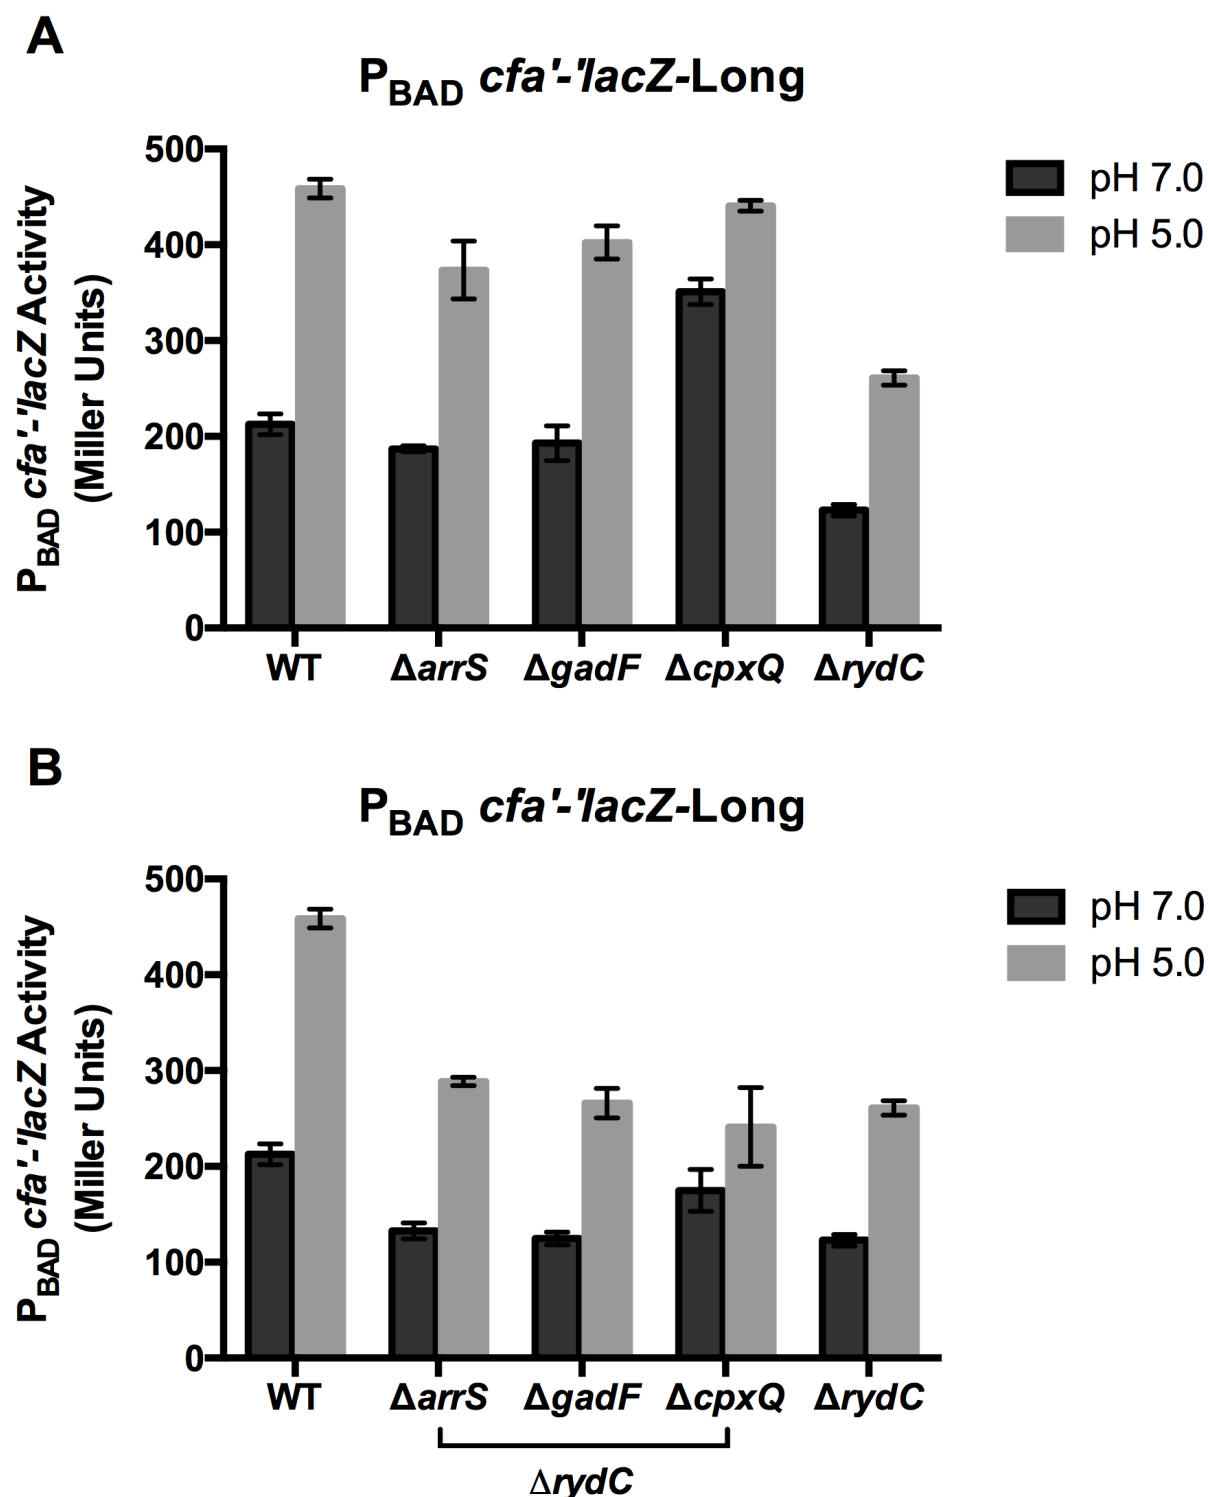

**Figure 5:** Deletion of sRNAs affect *cfa* translation and the response to acidic pH. (A) Cells carrying  $P_{BAD}$ -*cfa*'-'*lacZ*-Long in either WT background or a background where one sRNA is deleted were grown as described in Figure 4. (B) Cells carrying  $P_{BAD}$ -*cfa*'-'*lacZ*-Long (in either WT background or a background where *rydC* and one other sRNA are deleted) were grown as described in Figure 4.  $\Delta rydC$  single mutant is included for reference. Error bars represent standard deviation for three biological replicates.

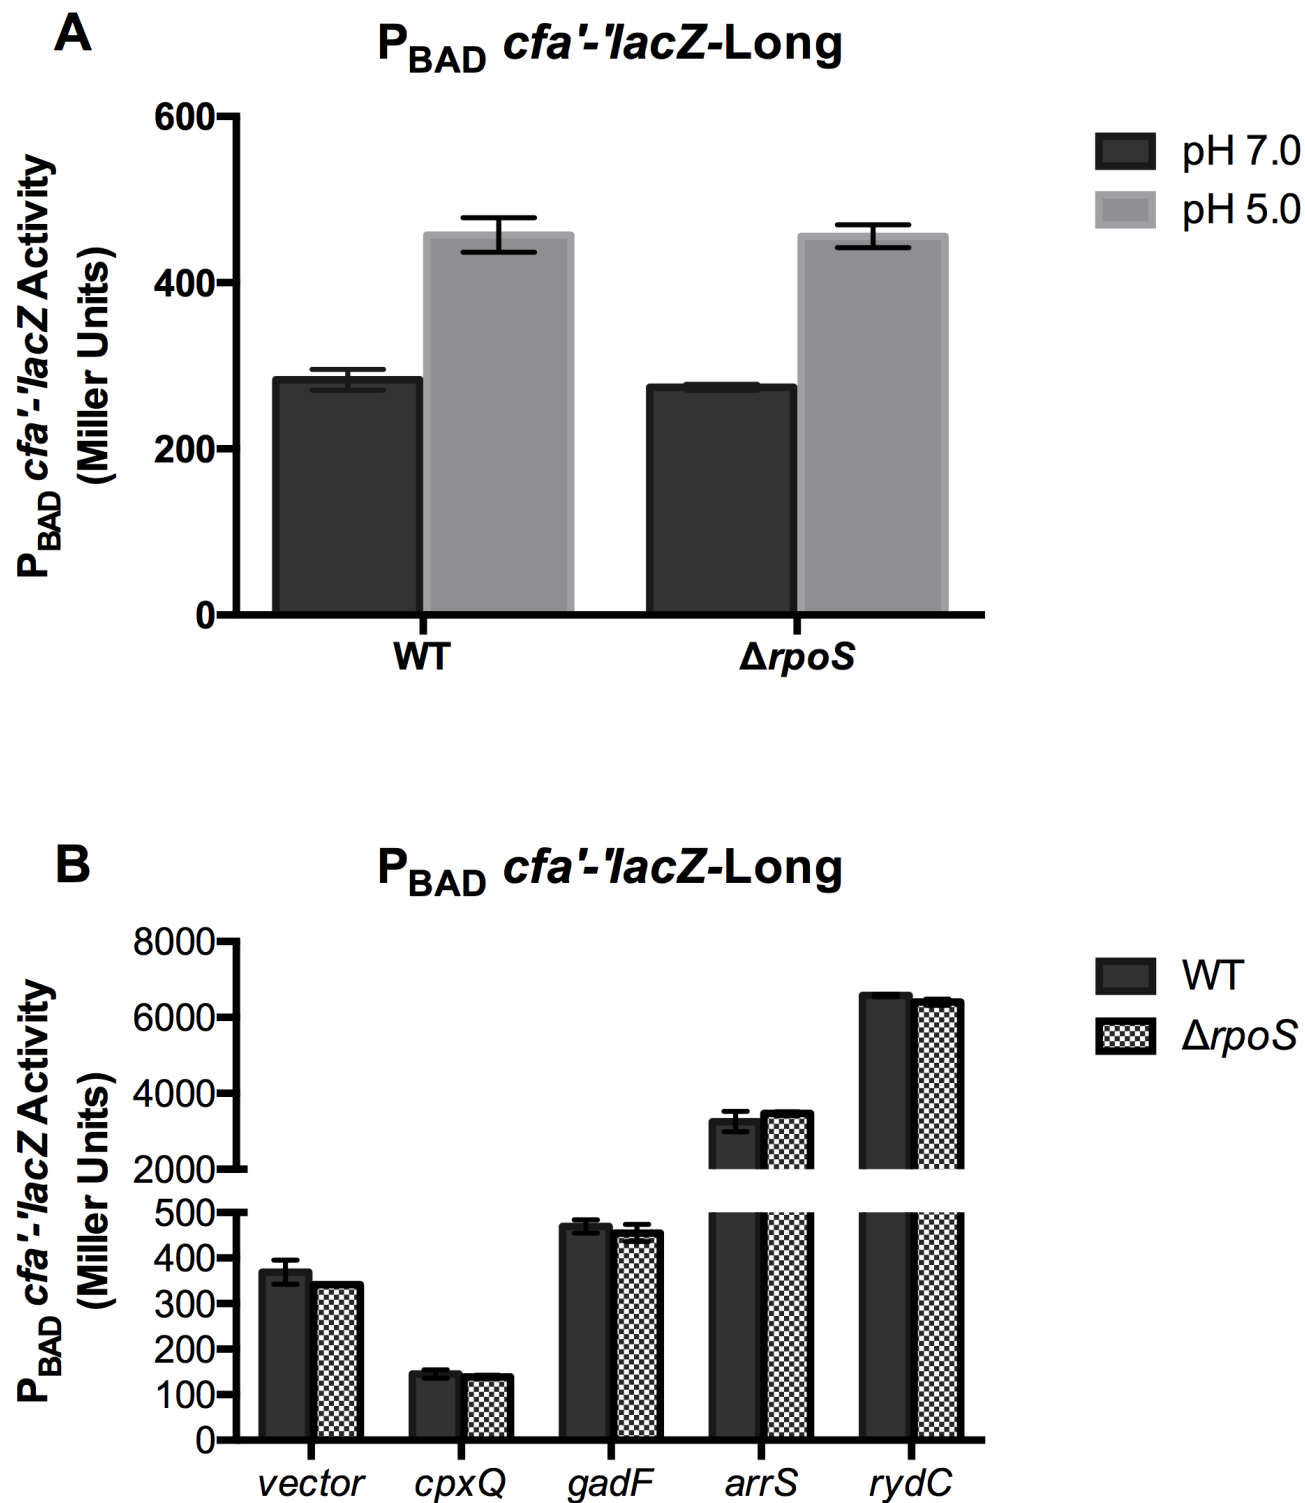

**Figure 6:** Deletion of *rpoS* does not affect  $P_{BAD}$ -*cfa'*-*lacZ*-Long activity. (A) Cells carrying  $P_{BAD}$ -*cfa'*-*lacZ*-Long in a WT or  $\Delta rpoS$  background were grown as described in Figure 4. (B)  $P_{BAD}$ -*cfa'*-*lacZ*-Long in a WT or  $\Delta rpoS$  background carrying an empty,  $P_{lac}$ -*arrS*,  $P_{lac}$ -*cpxQ*,  $P_{lac}$ -*gadF*, or  $P_{lac}$ -*rydC* plasmid were grown as described in Figure 1.

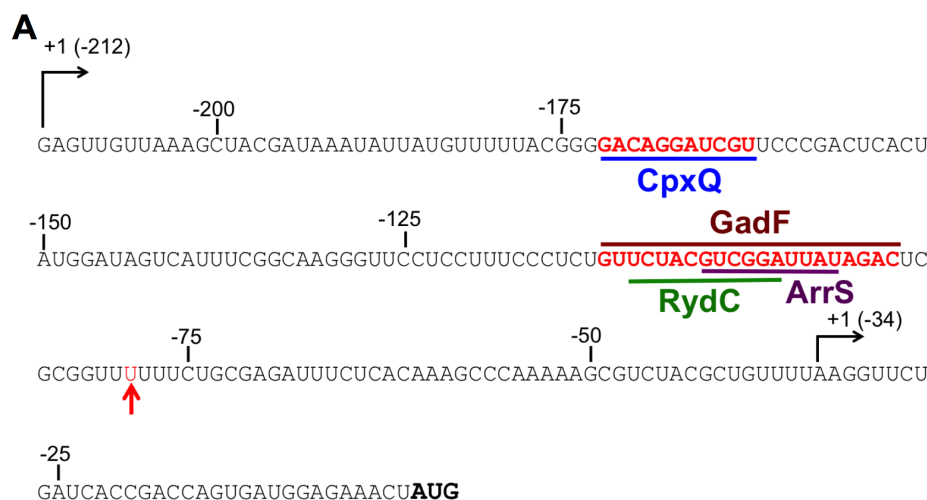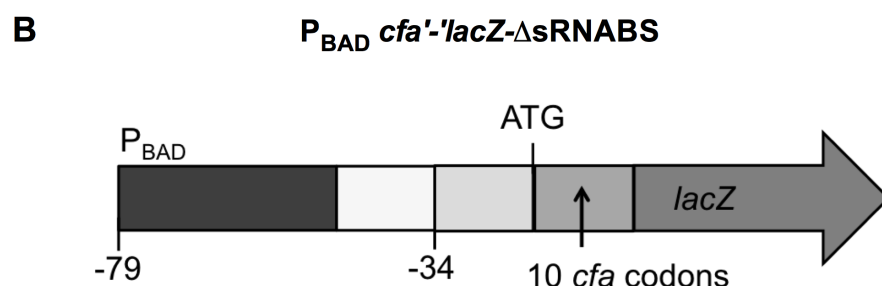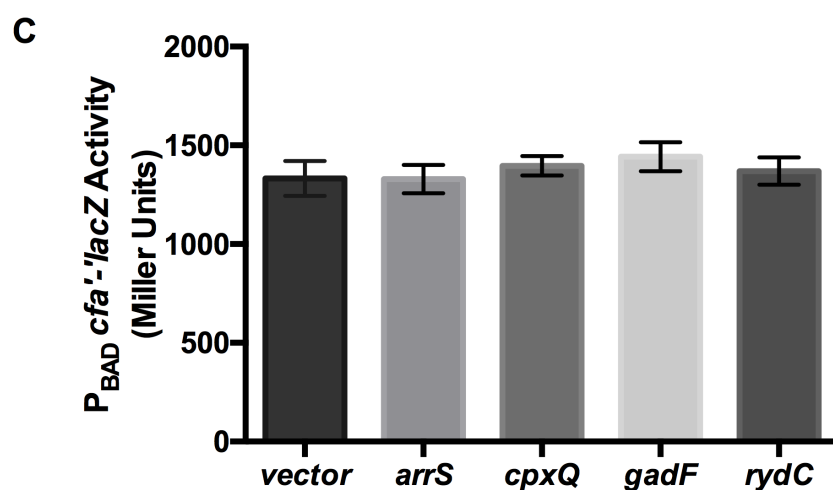

**Figure 7:** Deletion of the putative sRNA binding site removes regulation of *cfa* translation by ArrS, CpxQ, GadF, and RydC (A) 5' UTR of *cfa* gene. Arrows mark transcriptional start sites, sRNA binding sites are underlined, and -79 nt is marked by a red arrow. (B) A *cfa* translational fusion to *lacZ* ( $P_{BAD}$ -*cfa*'-'*lacZ*- $\Delta$ sRNABS) that begins immediately downstream of the predicted sRNA binding site was constructed. This fusion contains the proximal  $\sigma^S$  dependent promoter and 79-nt upstream of this promoter. (B)  $P_{BAD}$ -*cfa*'-'*lacZ*- $\Delta$ sRNABS cells carrying an empty,  $P_{lac}$ -*arrS*,  $P_{lac}$ -*cpxQ*,  $P_{lac}$ -*gadF*, or  $P_{lac}$ -*rydC* plasmid were grown as described in Figure 1. Data was analyzed as described in Figure 1.

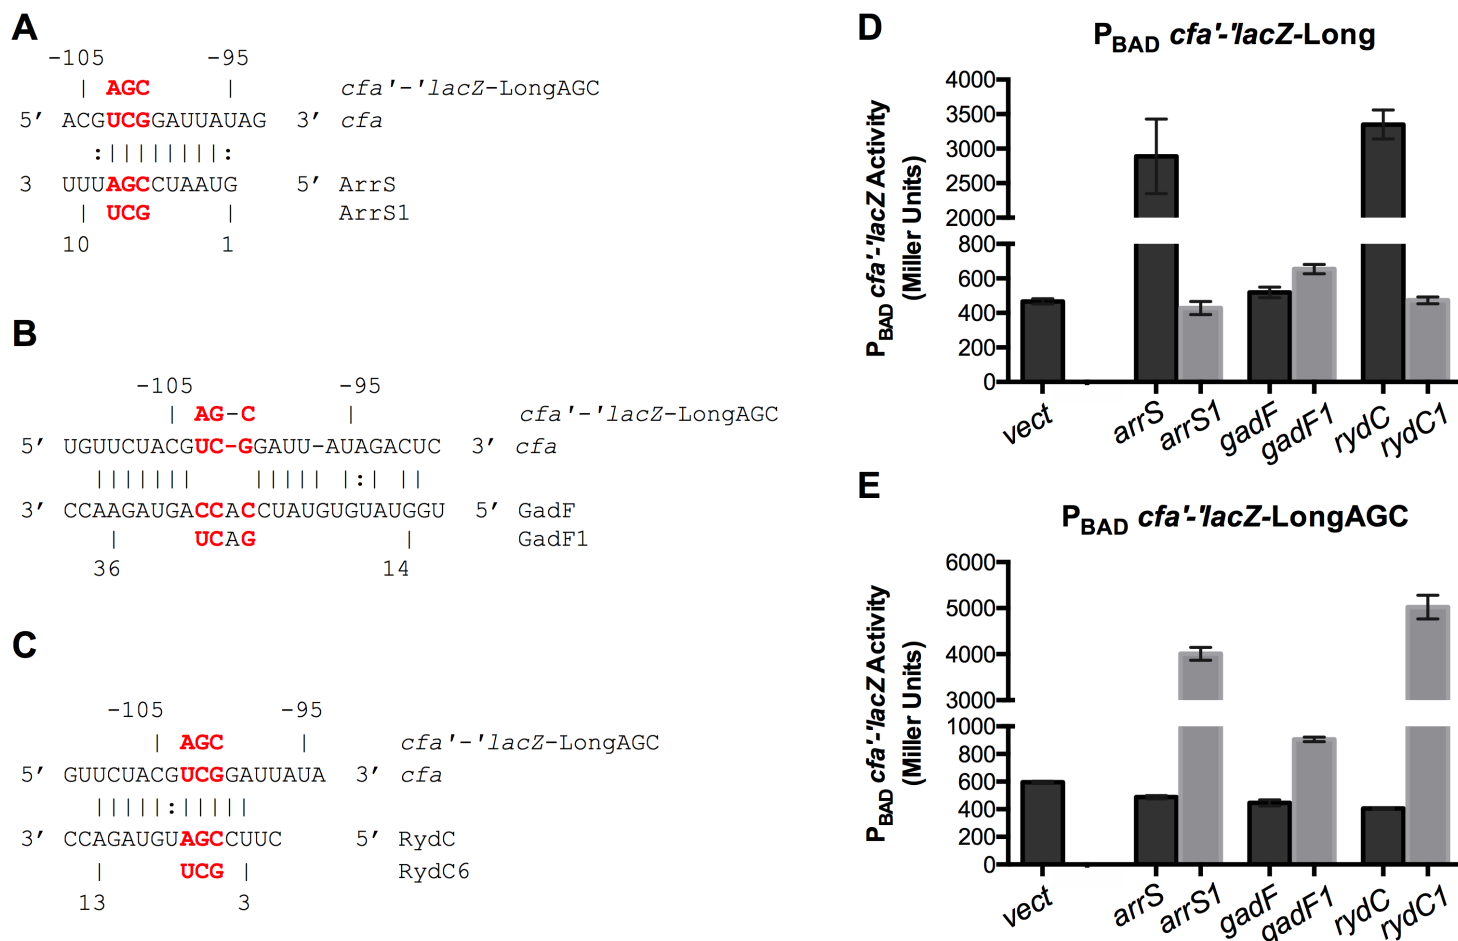

**Figure 8:** ArrS, GadF, and RydC base pair with the same site on *cfa* mRNA. (A-C) Predicted base pairing between *cfa* mRNA and (A) ArrS, (B) GadF, (C) RydC. The red nucleotides were mutated to test base pairing. (D) Mutant sRNAs (ArrS1, GadF1, RydC6) and WT sRNAs were tested for activation of WT P<sub>BAD</sub>-*cfa*'-lacZ-Long as described in Fig. 1B. (E) Three point mutations (U103A, C102G, G101C) were made in P<sub>BAD</sub>-*cfa*'-lacZ-Long (called P<sub>BAD</sub>-*cfa*'-lacZ-LongAGC). Mutant sRNAs (ArrS1, GadF1, RydC6) and WT sRNAs were tested for activation of P<sub>BAD</sub>-*cfa*'-lacZ-LongAGC as described in Fig. 1B.

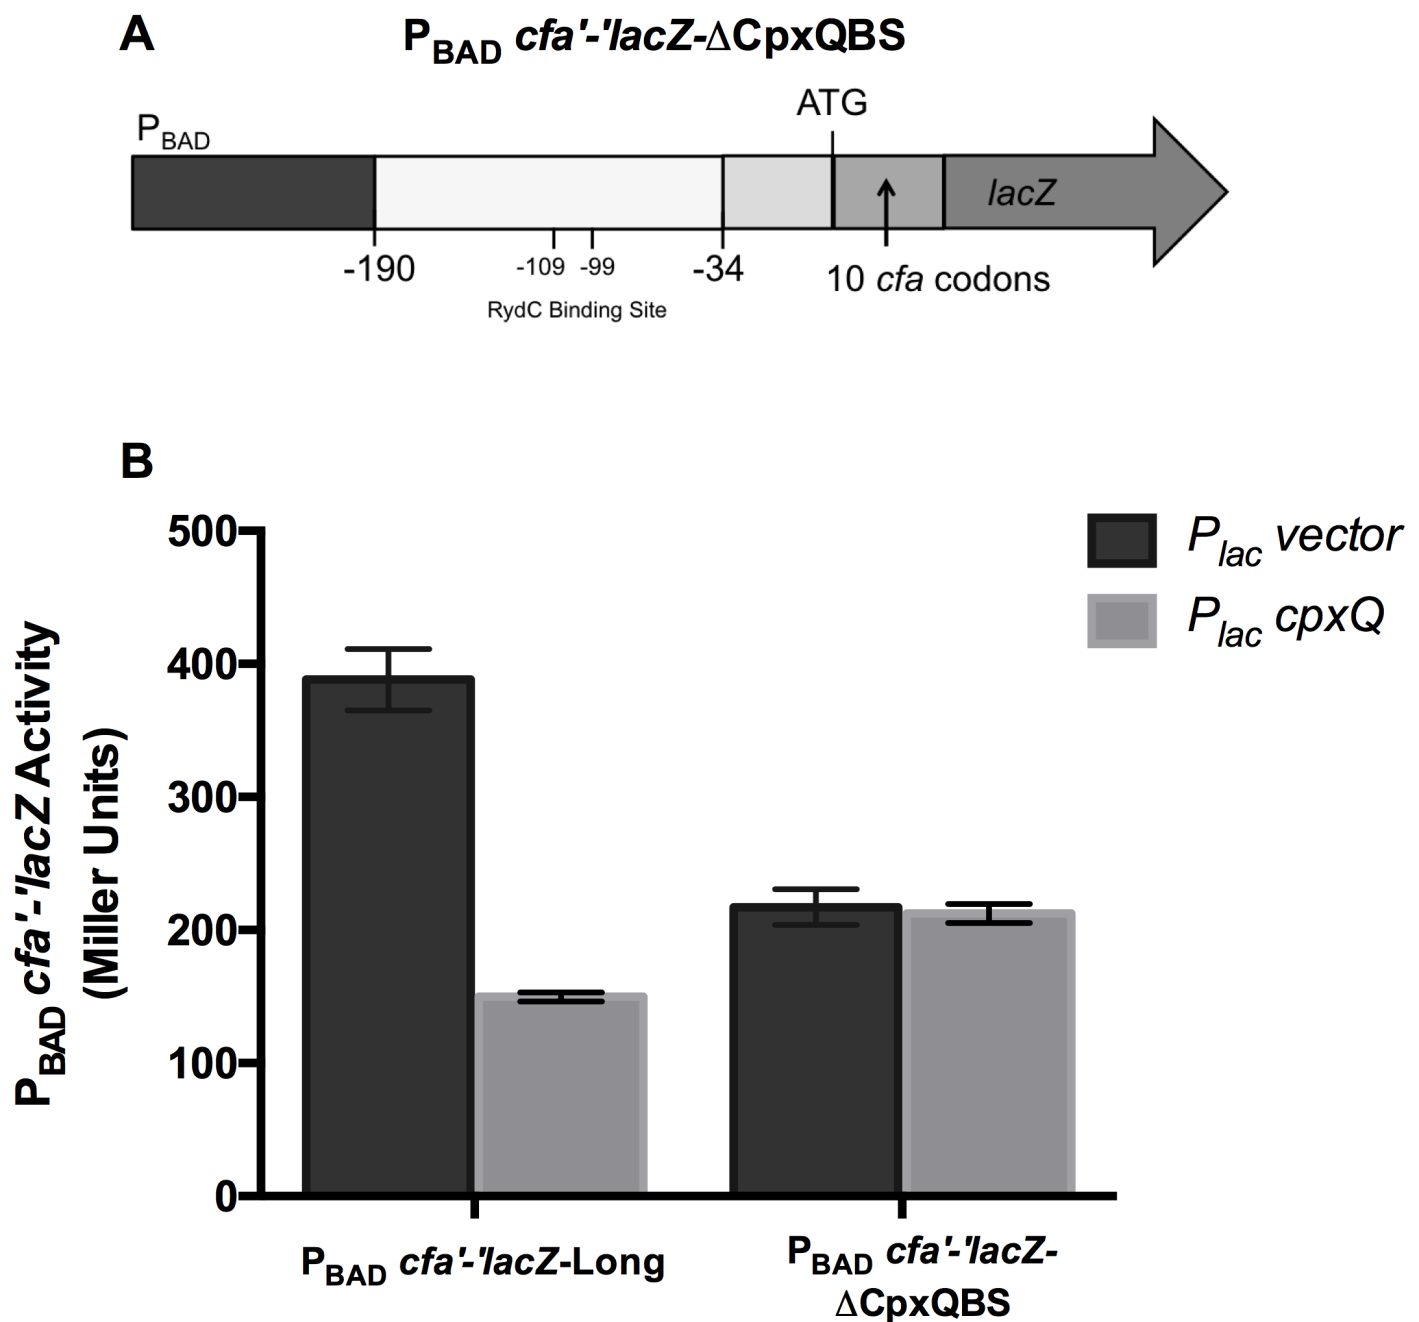

**Figure 9:** CpxQ cannot repress *cfa* translation when putative CpxQ binding site is deleted. (A) The last 20 nt of the -122-5' UTR (-210 to -190) which includes the putative CpxQ binding site, was deleted in  $P_{BAD}$ -*cfa'-'lacZ*-Long fusion (called  $P_{BAD}$ -*cfa'-'lacZ*- $\Delta CpxQBS$ ). (B) WT  $P_{BAD}$ -*cfa'-'lacZ*-Long or  $P_{BAD}$ -*cfa'-'lacZ*- $\Delta CpxQBS$  carrying an empty or  $P_{lac}$ -*cpxQ* plasmid were grown as described in Figure 1. Data was analyzed as described in Figure 1.



## Supplemental:

**Table S1:** Expression of sRNAs can alter fatty acid composition: Relative qualification of fatty acids in *E. coli* in response to ectopic expression of *arrS*, *cfa*, *gadF*, *cpxQ*, *rydC* or vector control. Fatty acids are presented as a percent of total identified fatty acids. Error represents average  $\pm$  standard deviation, n=3 or \*n=2. ND: not detected

| Fatty Acid   | p <sub>lac</sub> |                 |                   |                 |                |                 |
|--------------|------------------|-----------------|-------------------|-----------------|----------------|-----------------|
|              | <i>arrS</i>      | <i>cfa</i> *    | <i>gadF</i> *     | <i>cpxQ</i>     | <i>rydC</i> *  | <i>vector</i>   |
| C12:0        | 2.5 $\pm$ 1.1    | 1.8 $\pm$ 0.7   | 1.28 $\pm$ 0.09   | 1.0 $\pm$ 0.1   | 5.2 $\pm$ 0.5  | 1.29 $\pm$ 0.08 |
| C14:0        | 7.4 $\pm$ 1.5    | 6.0 $\pm$ 1.0   | 3.42 $\pm$ 0.05   | 3.1 $\pm$ 0.1   | 12.6 $\pm$ 3.8 | 3.6 $\pm$ 0.4   |
| C14:1        | ND               | ND              | 0.3 $\pm$ 0.3     | 0.18 $\pm$ 0.07 | ND             | ND              |
| C16:0        | 43.9 $\pm$ 1.1   | 43.3 $\pm$ 4.0  | 37.1 $\pm$ 0.46   | 30.7 $\pm$ 1.6  | 42.8 $\pm$ 0.3 | 33.6 $\pm$ 1.7  |
| C16:0 methyl | 0.8 $\pm$ 0.6    | 0.48 $\pm$ 0.08 | 1.13 $\pm$ 0.05   | 0.8 $\pm$ 0.2   | ND             | 0.9 $\pm$ 0.2   |
| C16:1        | 13.5 $\pm$ 1.5   | 10.9 $\pm$ 0.7  | 17.6 $\pm$ 0.3    | 19.9 $\pm$ 1.1  | 6.2 $\pm$ 0.4  | 18.9 $\pm$ 0.7  |
| C17:0 CFA    | 11.8 $\pm$ 1.0   | 13.7 $\pm$ 1.2  | 3.99 $\pm$ 0.06   | 1.2 $\pm$ 0.3   | 17.3 $\pm$ 3.8 | 2.2 $\pm$ 0.4   |
| C18:0        | 12.2 $\pm$ 1.6   | 14.4 $\pm$ 2.1  | 18.9 $\pm$ 0.1    | 25.4 $\pm$ 3.6  | 9.8 $\pm$ 2.0  | 21.7 $\pm$ 0.6  |
| C18:1        | 7.9 $\pm$ 0.7    | 9.1 $\pm$ 2.0   | 14.4 $\pm$ 0.5    | 13.8 $\pm$ 1.7  | 6.0 $\pm$ 0.7  | 14.9 $\pm$ 0.9  |
| C18:2        | ND               | ND              | ND                | ND              | ND             | ND              |
| C19:0 CFA    | ND               | 0.9 $\pm$ 0.3   | 0.57 $\pm$ 0.01   | ND              | ND             | ND              |
| C20:0        | ND               | ND              | 0.49 $\pm$ 0.08   | 1.1 $\pm$ 0.3   | ND             | 0.9 $\pm$ 0.1   |
| C22:0        | ND               | ND              | 0.33 $\pm$ 0.04   | 1.1 $\pm$ 0.3   | ND             | 0.7 $\pm$ 0.2   |
| C24:0        | ND               | ND              | 0.36 $\pm$ 0.04   | 1.1 $\pm$ 0.3   | ND             | 0.8 $\pm$ 0.2   |
| C26:0        | ND               | ND              | 0.100 $\pm$ 0.008 | 0.6 $\pm$ 0.3   | ND             | 0.3 $\pm$ 0.2   |

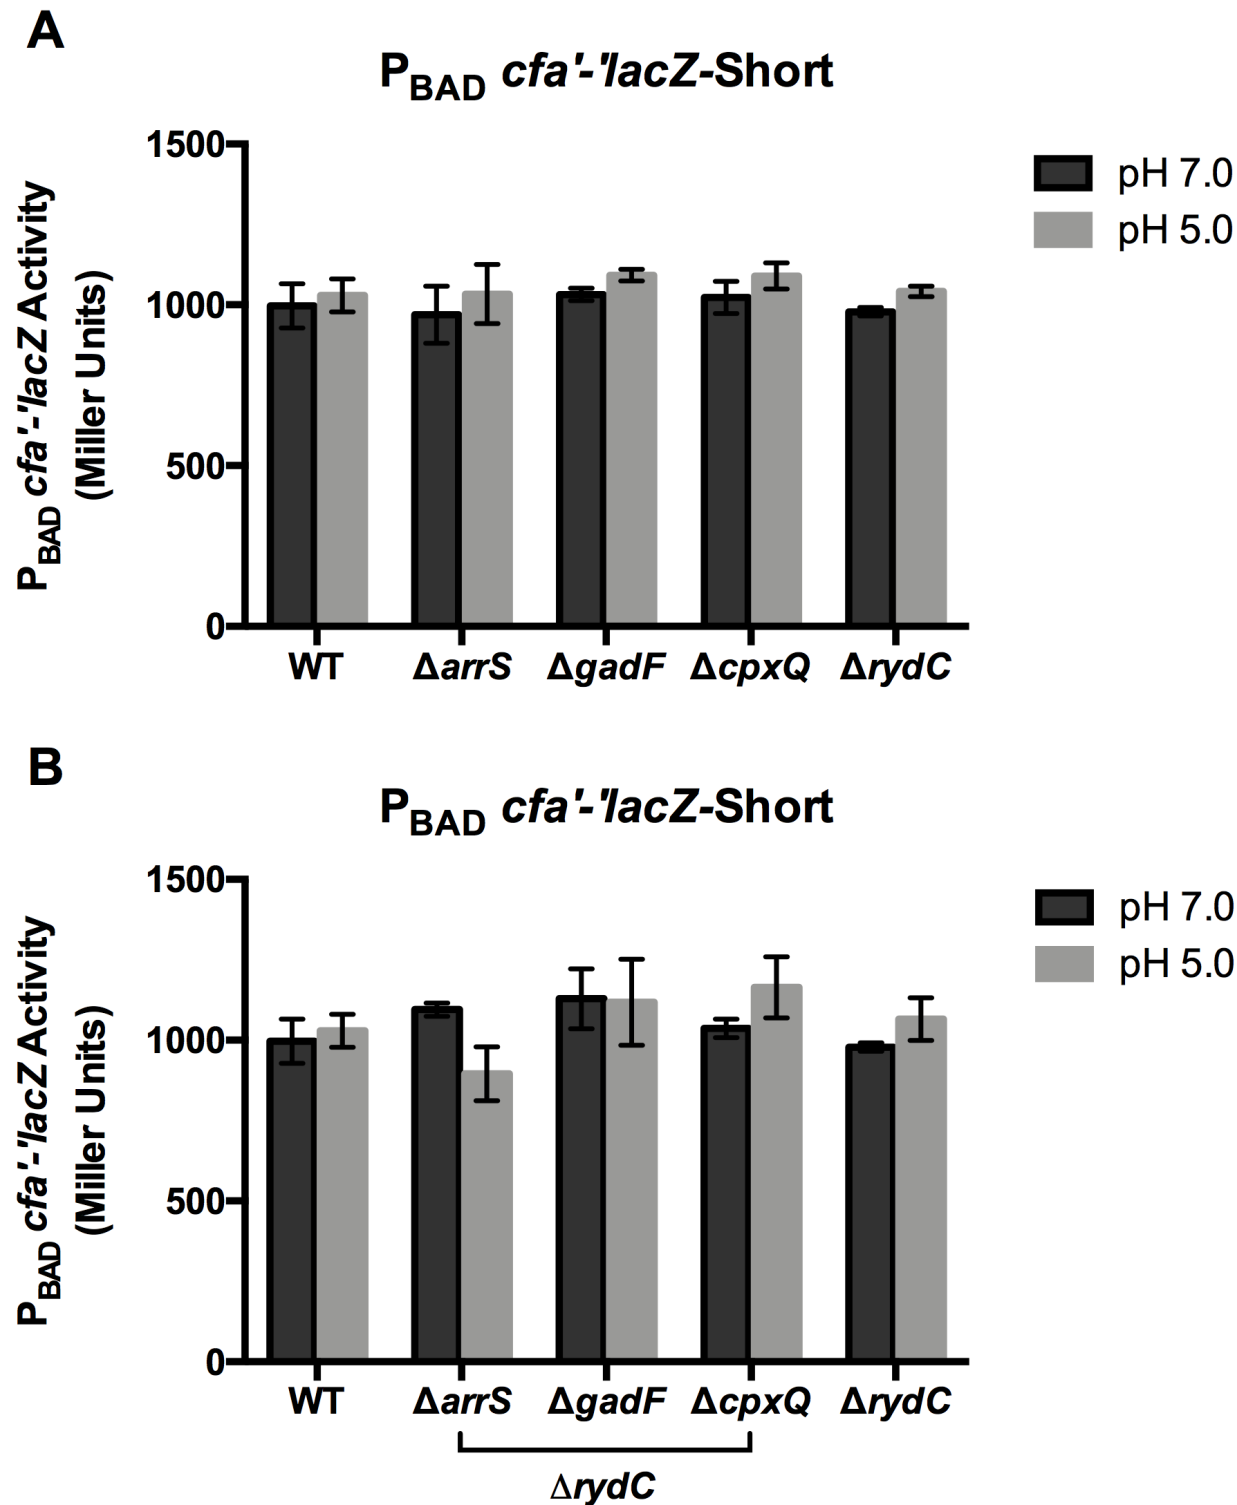

**Figure S1:** Deletion of sRNAs do not affect  $P_{BAD}$ -*cfa'*-*lacZ*-Short activity. (A) Cells carrying  $P_{BAD}$ -*cfa'*-*lacZ*-Short, as described in Figure 1C, in either a WT background or a background where one sRNA is deleted were grown as described in Figure 4. (B) Cells carrying  $P_{BAD}$ -*cfa'*-*lacZ*-Short (in either a WT background or a background where *rydC* and one other sRNA are deleted) were grown as described in Figure 4.  $\Delta rydC$  single mutant is included for reference.

**Table S2: Plasmids and Strains used in this study**

| Plasmid | Vector  | Genotype                        | Source or Reference         |
|---------|---------|---------------------------------|-----------------------------|
| pBRCS12 | pHDB3   | vector control                  | Wadler <i>et al.</i> , 2009 |
| pDK13   |         |                                 |                             |
| pBRCB1  | pBRCS12 | P <sub>lac</sub> - <i>cfa</i>   | This study                  |
| pBRCB2  | pBRCS12 | P <sub>lac</sub> - <i>arrS</i>  | This study                  |
| pBRCB3  | pBRCS12 | P <sub>lac</sub> - <i>cpqX</i>  | This study                  |
| pBRCB4  | pBRCS12 | P <sub>lac</sub> - <i>gadF</i>  | This study                  |
| pBRCB5  | pBRCS12 | P <sub>lac</sub> - <i>rydC</i>  | This study                  |
| pBRCB6  | pBRCS12 | P <sub>lac</sub> - <i>arrS1</i> | This study                  |
| pBRCB7  | pBRCS12 | P <sub>lac</sub> - <i>gadF1</i> | This study                  |
| pBRCB8  | pBRCS12 | P <sub>lac</sub> - <i>rydC6</i> | This study                  |

  

| Strain | Background | Genotype                                                                                                                                              | Source or Reference                  |
|--------|------------|-------------------------------------------------------------------------------------------------------------------------------------------------------|--------------------------------------|
| DJ480  | MG1655     | Δ <i>lac</i> X74                                                                                                                                      | D. Jin, NCI*                         |
| PM1205 | PM1203     | <i>lacI</i> ::P <sub>BAD</sub> - <i>cat-sacB-lacZ</i> , <i>mini</i> tet <sup>R</sup> , Δ <i>araBAD araC</i> +, <i>mal</i> :: <i>lacI</i> <sup>q</sup> | Mandin <i>et al.</i> , 2009          |
| CB 438 | DJ480      | λattB:: <i>lacI</i> q                                                                                                                                 | This study                           |
| CB 546 | CB 438     | <i>lacI</i> q λatt Δ <i>ArrS</i> plac vector                                                                                                          | This study                           |
| CB 547 | CB 438     | <i>lacI</i> q λatt Δ <i>ArrS</i> plac <i>ArrS</i>                                                                                                     | This study                           |
| CB 548 | CB 438     | <i>lacI</i> q λatt Δ <i>CpxQ</i> plac vector                                                                                                          | This study                           |
| CB 549 | CB 438     | <i>lacI</i> q λatt Δ <i>CpxQ</i> plac <i>CpxQ</i>                                                                                                     | This study                           |
| CB 550 | CB 438     | <i>lacI</i> q λatt Δ <i>GadF</i> plac vector                                                                                                          | This study                           |
| CB 551 | CB 438     | <i>lacI</i> q λatt Δ <i>GadF</i> plac <i>GadF</i>                                                                                                     | This study                           |
| CB 552 | CB 438     | <i>lacI</i> q λatt Δ <i>RydC</i> plac vector                                                                                                          | This study                           |
| CB 553 | CB 438     | <i>lacI</i> q λatt Δ <i>RydC</i> plac <i>RydC</i>                                                                                                     | This study                           |
| CB 554 | CB 438     | <i>lacI</i> q λatt plac vector                                                                                                                        | This study                           |
| CB 567 | CB 438     | <i>lacI</i> q λatt Δ <i>cfa</i> plac vector                                                                                                           | This study                           |
| CB 568 | CB 438     | <i>lacI</i> q λatt Δ <i>cfa</i> plac <i>cfa</i>                                                                                                       | This study                           |
| AK 27  | PM1205     | P <sub>BAD</sub> - <i>cfa</i> '- <i>lacZ</i> -Long                                                                                                    | This study (King <i>et al.</i> 2018) |
| AK 28  | PM1205     | P <sub>BAD</sub> - <i>cfa</i> '- <i>lacZ</i> -Short                                                                                                   | This study (King <i>et al.</i> 2018) |
| CB 582 | AK 28      | P <sub>BAD</sub> - <i>cfa</i> '- <i>lacZ</i> -Short Δ <i>cpxQ</i>                                                                                     | This study                           |
| CB 583 | AK 27      | P <sub>BAD</sub> - <i>cfa</i> '- <i>lacZ</i> -Long Δ <i>cpxQ</i>                                                                                      | This study                           |
| CB 588 | AK 27      | P <sub>BAD</sub> - <i>cfa</i> '- <i>lacZ</i> -Long Δ <i>rydC</i>                                                                                      | This study                           |
| CB 589 | AK 28      | P <sub>BAD</sub> - <i>cfa</i> '- <i>lacZ</i> -Short Δ <i>rydC</i>                                                                                     | This study                           |
| CB 590 | AK 27      | P <sub>BAD</sub> - <i>cfa</i> '- <i>lacZ</i> -Long Δ <i>gadF</i>                                                                                      | This study                           |
| CB 591 | AK 28      | P <sub>BAD</sub> - <i>cfa</i> '- <i>lacZ</i> -Short Δ <i>gadF</i>                                                                                     | This study                           |
| CB 594 | AK 27      | P <sub>BAD</sub> - <i>cfa</i> '- <i>lacZ</i> -Long Δ <i>arrS</i>                                                                                      | This study                           |
| CB 595 | AK 28      | P <sub>BAD</sub> - <i>cfa</i> '- <i>lacZ</i> -Short Δ <i>arrS</i>                                                                                     | This study                           |
| CB 600 | AK 27      | P <sub>BAD</sub> - <i>cfa</i> '- <i>lacZ</i> -Long Δ <i>rydC</i> Δ <i>cpxQ</i>                                                                        | This study                           |
| CB 601 | AK 28      | P <sub>BAD</sub> - <i>cfa</i> '- <i>lacZ</i> -Short Δ <i>rydC</i> Δ <i>cpxQ</i>                                                                       | This study                           |
| CB 602 | AK 27      | P <sub>BAD</sub> - <i>cfa</i> '- <i>lacZ</i> -Long Δ <i>rydC</i> Δ <i>gadF</i>                                                                        | This study                           |
| CB 603 | AK 28      | P <sub>BAD</sub> - <i>cfa</i> '- <i>lacZ</i> -Short Δ <i>rydC</i> Δ <i>gadF</i>                                                                       | This study                           |
| CB 611 | AK 27      | P <sub>BAD</sub> - <i>cfa</i> '- <i>lacZ</i> -Long Δ <i>rydC</i> Δ <i>arrS</i>                                                                        | This study                           |
| CB 612 | AK 28      | P <sub>BAD</sub> - <i>cfa</i> '- <i>lacZ</i> -Short Δ <i>rydC</i> Δ <i>arrS</i>                                                                       | This study                           |
| CB 615 | AK 27      | P <sub>BAD</sub> - <i>cfa</i> '- <i>lacZ</i> -Long Δ <i>rpoS</i>                                                                                      | This study                           |
| CB 617 | AK 27      | P <sub>BAD</sub> - <i>cfa</i> '- <i>lacZ</i> -Long Δ <i>rpoS</i> Plac- <i>arrS</i>                                                                    | This study                           |
| CB 618 | AK 27      | P <sub>BAD</sub> - <i>cfa</i> '- <i>lacZ</i> -Long Δ <i>rpoS</i> Plac- <i>cpxQ</i>                                                                    | This study                           |
| CB 619 | AK 27      | P <sub>BAD</sub> - <i>cfa</i> '- <i>lacZ</i> -Long Δ <i>rpoS</i> Plac- <i>gadF</i>                                                                    | This study                           |
| CB 620 | AK 27      | P <sub>BAD</sub> - <i>cfa</i> '- <i>lacZ</i> -Long Δ <i>rpoS</i> Plac- <i>rydC</i>                                                                    | This study                           |
| CB 621 | AK 27      | P <sub>BAD</sub> - <i>cfa</i> '- <i>lacZ</i> -Long Δ <i>rpoS</i> Plac-vector                                                                          | This study                           |
| CB 622 | PM 1205    | P <sub>BAD</sub> - <i>cfa</i> '- <i>lacZ</i> -Long Δ <i>sRNABS</i>                                                                                    | This study                           |
| CB 623 | PM 1205    | P <sub>BAD</sub> - <i>cfa</i> '- <i>lacZ</i> -Long Δ <i>sRNABS</i> Plac- <i>cpxQ</i>                                                                  | This study                           |
| CB 624 | PM 1205    | P <sub>BAD</sub> - <i>cfa</i> '- <i>lacZ</i> -Long Δ <i>sRNABS</i> Plac- <i>gadF</i>                                                                  | This study                           |
| CB 625 | PM 1205    | P <sub>BAD</sub> - <i>cfa</i> '- <i>lacZ</i> -Long Δ <i>sRNABS</i> Plac- <i>rydC</i>                                                                  | This study                           |
| CB 626 | PM 1205    | P <sub>BAD</sub> - <i>cfa</i> '- <i>lacZ</i> -Long Δ <i>sRNABS</i> Plac-vector                                                                        | This study                           |
| CB 627 | PM 1205    | P <sub>BAD</sub> - <i>cfa</i> '- <i>lacZ</i> -Long Δ <i>sRNABS</i> Plac- <i>arrS</i>                                                                  | This study                           |
| CB 639 | PM 1205    | P <sub>BAD</sub> - <i>cfa</i> '- <i>lacZ</i> -Long Δ <i>CpxQBS</i>                                                                                    | This study                           |
| CB 736 | PM 1205    | P <sub>BAD</sub> - <i>cfa</i> '- <i>lacZ</i> -LongAGC                                                                                                 | This study                           |

\*NCI, National Cancer Institute, Frederick, MD

## Table S3: Oligos used in this study

| Oligo | Description                                                                                  | Sequence 5'-3'                                                           |
|-------|----------------------------------------------------------------------------------------------|--------------------------------------------------------------------------|
| CB128 | Forward primer for FRT-kanR-FRT cassette insertion in ArrS                                   | CCAGTTTGTGATCTCTGAAGAATATTACTAAAGTTAAATATTCCGGGGATCCGTCGACC              |
| CB131 | Reverse primer for FRT-kanR-FRT cassette insertion in ArrS                                   | ACATGAATGCGTTATTACTCAGGTAATTTCAATGCGTTATGTAGGCTGGAGCTGCTTCG              |
| CB132 | Forward primer for FRT-kanR-FRT cassette insertion in RydC                                   | ATTATGGTTTTATTATCATACAATAAATAATAGGCGATTCCGGGGATCCGTCGACC                 |
| CB133 | Reverse primer for FRT-kanR-FRT cassette insertion in RydC                                   | CTACGCGATGATGCCGCGTAAACGTTCTCTGAAGGATATTATGTAGGCTGGAGCTGCTTCG            |
| CB134 | Forward primer for FRT-kanR-FRT cassette insertion in GadF                                   | ATTACCCCGGTGATTACTAAAGGAGAGGCTAAACGAATTCCGGGGATCCGTCGACC                 |
| CB135 | Reverse primer for FRT-kanR-FRT cassette insertion in GadF                                   | GATACAGGCACAGTGATCGACATGGTGAGGTCAACGACTGTAGGCTGGAGCTGCTTCG               |
| CB136 | Forward primer for FRT-kanR-FRT cassette insertion in CpxQ                                   | GTTGAAGCTATTGAGTAGTAGCAACTCACGTTCCCGAGtagATTCCGGGGATCCGTCGACC            |
| CB137 | Reverse primer for FRT-kanR-FRT cassette insertion in CpxQ                                   | GCAAATTGAGGATAAAAAAACCCCCACAGCATGTGGGGGTGTAGGCTGGAGCTGCTTCG              |
| CB91  | Forward confirmation primer for FRT-kanR-FRT cassette cloning in ArrS                        | GCGGATTACTGCCCAAGAATAAG                                                  |
| CB92  | Reverse confirmation primer for FRT-kanR-FRT cassette cloning in ArrS                        | CCGTGTCTCCAGACGCTATATA                                                   |
| CB109 | Forward confirmation primer for FRT-kanR-FRT cassette cloning in GadF                        | AGGACATAAGCAACTGAAATTGATG                                                |
| CB110 | Reverse confirmation primer for FRT-kanR-FRT cassette cloning in GadF                        | CGAGGAGAGATATGAGGGATT                                                    |
| CB113 | Forward confirmation primer for FRT-kanR-FRT cassette cloning in CpxQ                        | GCAATGGCAAAAAAGTTCATCG                                                   |
| CB114 | Reverse confirmation primer for FRT-kanR-FRT cassette cloning in CpxQ                        | GACCCGGTATACCACCAT                                                       |
| CB124 | Forward primer for cloning <i>E. coli</i> ArrS into pBRCS12 contains Bam site                | CCCCCCCCGGATCCGTAATCCGATTAAATATCGAGTCTC                                  |
| CB98  | Reverse primer for cloning <i>E. coli</i> ArrS into pBRCS12 contains HindIII site            | CCCCCCCCAAGCTTCGTTATTACTCAGGTAATTTCAATGCG                                |
| CB125 | Forward primer for cloning <i>E. coli</i> RydC into pBRCS12 contains Bam site                | CCCCCCCCGGATCCCTTCGATGTAGACCCGTATTCTT                                    |
| CB100 | Reverse primer for cloning <i>E. coli</i> RydC into pBRCS12 contains HindIII site            | CCCCCCCCAAGCTTCCGCGTAAACGTTCTCTGAAGGATAT                                 |
| CB126 | Forward primer for cloning <i>E. coli</i> GadF into pBRCS12 contains Bam site                | CCCCCCCCGGATCCCTTTATTCCCTGGTATGTGTATCC                                   |
| CB102 | Reverse primer for cloning <i>E. coli</i> GadF into pBRCS12 contains HindIII site            | CCCCCCCCAAGCTTGATCGACATGGTGAGGTCAAC                                      |
| CB127 | Forward primer for cloning <i>E. coli</i> CpxQ into pBRCS12 contains Bam site                | CCCCCCCCGGATCCCTTTCTCTTGCCATAGACCCATCCC                                  |
| CB106 | Reverse primer for cloning <i>E. coli</i> CpxQ into pBRCS12 contains HindIII site            | CCCCCCCCAAGCTTTGACGCTAGTATAACGGAAGC                                      |
| CB175 | Forward primer for cloning <i>cfa</i> 5'UTR into PM1205 to make PBAD -cfa'-lacZ-Long ΔsRNABS | ACCTGACGCTTTTTATCGCAACTCTCTACTGTTTCTCCATTTCTGCGAGATTTCTCACAA             |
| CB176 | Reverse primer for cloning <i>cfa</i> 5'UTR into PM1205 to make PBAD -cfa'-lacZ-Long ΔsRNABS | TAACGCCAGGGTTTTCCCGAGTCACGACGTTGTAACACGACCGGGGCAGAACCGTTAATGG            |
| CB202 | Forward primer for cloning <i>cfa</i> 5'UTR using Gibson to make PBAD -cfa'-lacZ-LongAGC     | AAAGCCCCAAAAAGCGTCTACGCTGTTTTAAGGTTCTGATCACCAGCCAGTGATGGAGAAACTATGAGTTC/ |
| CB203 | Reverse primer for cloning <i>cfa</i> 5'UTR using Gibson to make PBAD -cfa'-lacZ-LongAGC     | GTAGACGCTTTTTGGGCTTTGTGAGAAATCTCGCAGAAAAAACCGCGAGTCTATAATCGCTCGTAGAACAC  |
| CB204 | Forward confirmation primer for PBAD -cfa'-lacZ-LongAGC                                      | AAGCATTATCAGGGTTATTGTCTCATGAGC                                           |
| CB205 | Reverse confirmation primer for PBAD -cfa'-lacZ-LongAGC                                      | AAACAACTGGCGGTATGGATGC                                                   |
| CBQ1  | Forward primer for QuikChange mutagenesis of <i>ArrS</i> to make <i>ArrS1</i>                | cgaacaaggagactcgatattaaagcgattacggatccagtagtctgttgc                      |
| CBQ2  | Reverse primer for QuikChange mutagenesis of <i>ArrS</i> to make <i>ArrS1</i>                | gataacaagatactggatccgtaatcgcttttaaatatcgagtcctgttgc                      |
| CBQ3  | Forward primer for QuikChange mutagenesis of <i>GadF</i> to make <i>GadF1</i>                | caacgaagggttctactagtcgatacacataccagggg                                   |
| CBQ4  | Reverse primer for QuikChange mutagenesis of <i>GadF</i> to make <i>GadF1</i>                | ccctggtatgtgtatcgactagtagaaccttcgttg                                     |
| CBQ5  | Forward primer for QuikChange mutagenesis of <i>RydC</i> to make <i>RydC6</i>                | gcgaagaatacgggtctacaagcgaagggtatccagtagtctgt                             |
| CBQ6  | Reverse primer for QuikChange mutagenesis of <i>RydC</i> to make <i>RydC6</i>                | acaagatactggatcccttcgctgttagaccgtagtcttcgc                               |
|       | Primer for cpxQ BS                                                                           |                                                                          |
|       | Primer for Ak27 and 28                                                                       |                                                                          |
